# Supplementary material for: Overexpression of Global Regulator SCrp Leads to the Discovery of New Angucyclines in Streptomyces sp. XS-16
Source: MDPI journal article supplement (doi:10.3390/md21040240), 2023-04-14

## Contents

|                                                                           |    |
|---------------------------------------------------------------------------|----|
| <b>Section S1.</b> Construction section of the plasmid pSET152-SCrp ..... | 2  |
| <b>Section S2.</b> Computational details for <b>1</b> .....               | 5  |
| S2.1. Computational details for compound <b>1</b> (ECD) .....             | 5  |
| S2.2. Computational details for compound <b>1</b> (NMR).....              | 6  |
| <b>Section S3.</b> Computational details for <b>2</b> .....               | 11 |
| S3.1. Computational details for compound <b>2</b> (NMR).....              | 11 |
| S3.2. Computational details for compound <b>2</b> (ECD).....              | 13 |
| <b>Section S4.</b> NMR, HRESIMS, and IR spectra of <b>1</b> .....         | 14 |
| <b>Section S5.</b> NMR, HRESIMS, and IR spectra of <b>2</b> .....         | 18 |
| <b>Section S6.</b> NMR, HRESIMS, and IR spectra of <b>3</b> .....         | 22 |

## Section S1. Construction section of the plasmid pSET152-SCrp

**Table S1.** The primers used in this study. (5' to 3')

| Primers   | Sequences                                     |
|-----------|-----------------------------------------------|
| SCrp-F    | ACAATCGTGCCGGTTGGTAGGATCCgtggacgacgttctgcggcg |
| SCrp-R    | AGCTTGGGCTGCAGGTCGACTCTAGAtcagcgcgagcgcttcgcc |
| YZ-SCrp-F | GAGTTCGAGGTACGCGGCTTG                         |
| YZ-SCrp-R | CCTCTTCGCTATTACGCCAGCTG                       |

Note: The homologous arms are represented by lowercase letters.

**Figure S1.** AntiSMASH analysis of the genome of the strain *Streptomyces* sp. XS-16. The predicted 29 gene clusters include 5 PKS, 6 NRPS, 5 Terpene, 1 PKS-NRPS hybrids, 2 Bacteriocin, 10 Other clusters.

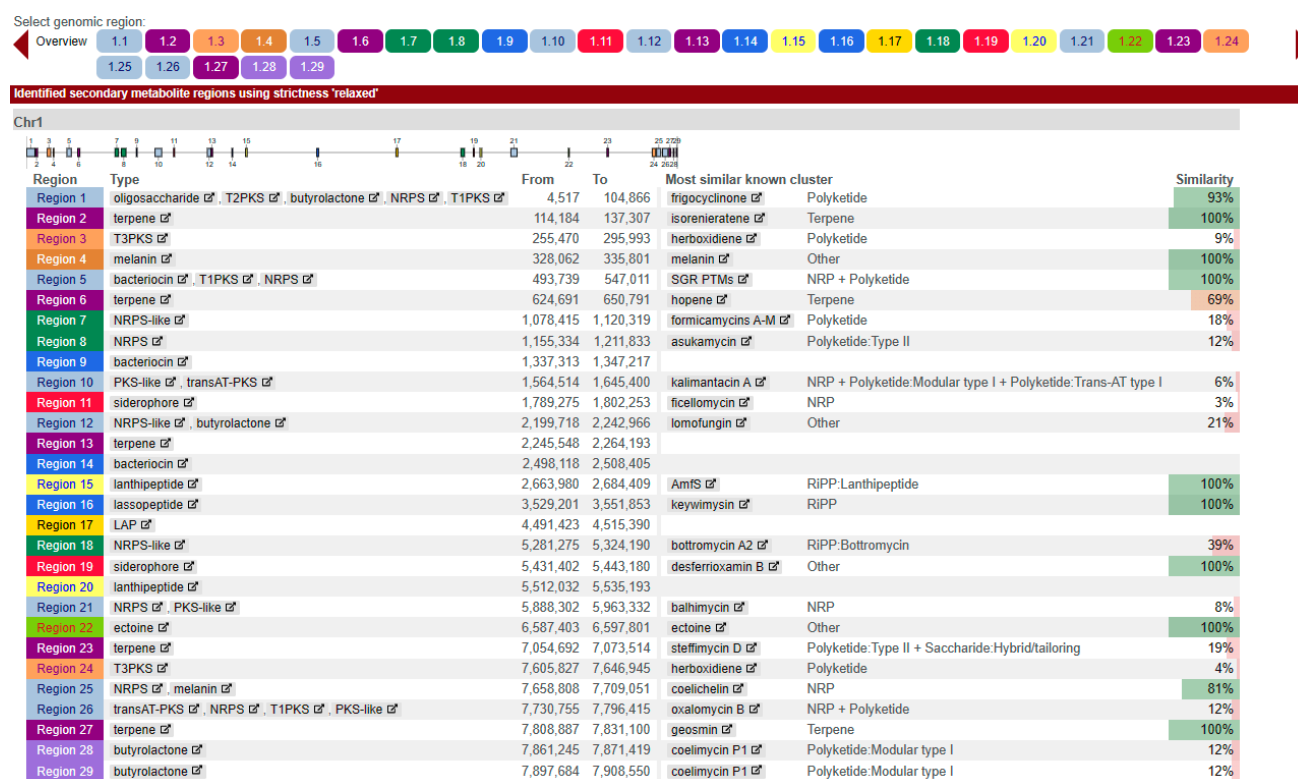

**Table S2.** The sequence of SCrp. (5' to 3')

| Name | Sequence                                                                                                                                                                                                                                                                                                                                                                                                                                                                                                                                                                                                                                                                                                                        |
|------|---------------------------------------------------------------------------------------------------------------------------------------------------------------------------------------------------------------------------------------------------------------------------------------------------------------------------------------------------------------------------------------------------------------------------------------------------------------------------------------------------------------------------------------------------------------------------------------------------------------------------------------------------------------------------------------------------------------------------------|
|      | GTGGACGACGTTCTGCGGCGCGCCCCGCTTTTCGCGGCGCTCGATGATGAGCAGGCCGCGG<br>AGCTCCGCGCCTCGATGAGTGAGGTGACCCTCGCGCGCGGCGACGCGCTTTTCCATGAGGG<br>CGACCAGGGTGACCGCCTGTACGTGGTCACCGAGGGCAAGGTGAAGCTCCACCGCACCTC<br>GCCCCGACGGGCGCGAGAACATGCTGGCCGTGCTCGGTCCCGGCGAGCTGATCGGTGAGCT<br>CTCGCTCTTCGACCCCGGCCCGCGTACGGCGACCGCCTCCGCGCTGACCGAGGTCAAGCTC<br>CTCGGCCTCGGCCACGGCGACCTGCAGCCCTGGCTCAACGCCCCGGCCCGAGGTGCGCACCG<br>CGCTGCTGCGCGCGGTGCGCCGGCGCCTGCGCAAGACCAACGACCAGATGTCCGACCTGG<br>TCTTCTCCGACGTGCCGGGCGGTGTCGCCCCGCGCCCTCCTGGACCTGTCGCGCCGCTTCGGC<br>GTCCAGTCGGAGGAAGGAATCCACGTGCGTGACGACCTCAGGAGGAGCTGGCCAG<br>CTGGTCGGCGCCTCCCGCGAGACGGTCAACAAGGCCCTCGCGGACTTCGCGGGCCGCGGC<br>TGGCTGCGCCTGGAGGCCCGCGCGGTATCCTGCTGGACGTGGAGCGCCTGGCGAAGCGC |
| SCrp | TCGCGCTGA                                                                                                                                                                                                                                                                                                                                                                                                                                                                                                                                                                                                                                                                                                                       |

Note: The homologous arms are represented by lowercase letters.

**Figure S2.** Map of the vector SCrp overexpression plasmid pSET152-SCrp.

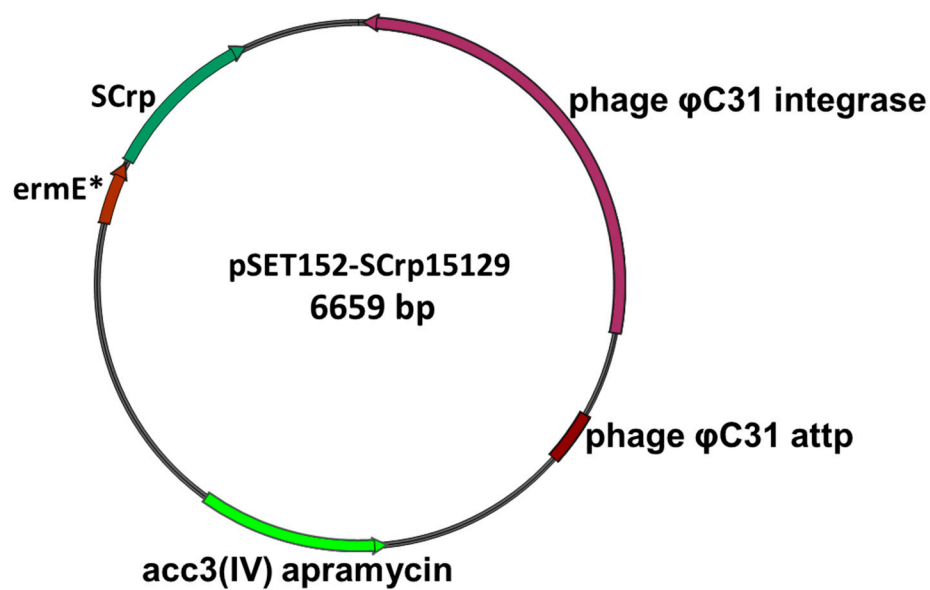

**Figure S3.** PCR analysis for confirming the plasmid construction. The results showed that mutants 1-5 were desired.

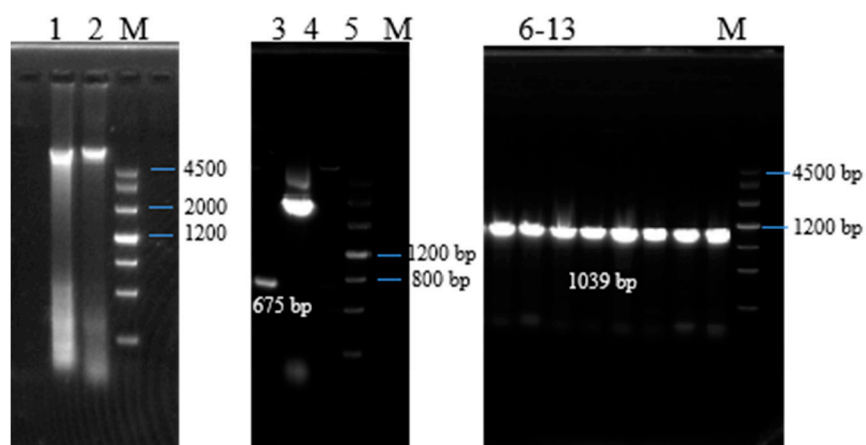

Notes:

- 1-2: the genome of XS-16;
- 3: pSET152-XS-16-crp after purification
- 4: pSET152-ermE\*;
- 5: pSET152-ermE\*(BamHI)
- 6-13: pSET152-SCrp mutants
- M: markerIII

## Section S2. Computational details for 1

### S2.1. Computational details for compound 1 (ECD)

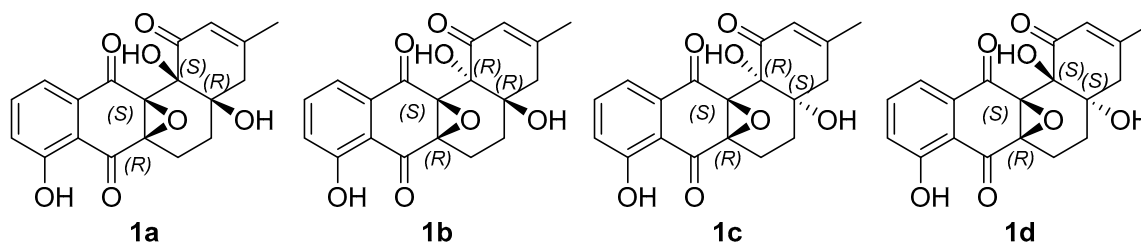

Conformation search based on molecular mechanics with MMFF force fields (Spartan'14, Wavefunction, Inc.) were performed for **1a**, **1b**, **1c**, and **1d** gave 3, 4, 3, and 2 stable conformers within 20 kJ/mol, respectively. All these conformers were further optimized by the density functional theory method at the B3LYP/6-31G(d) level by Gaussian 16 program package. The ECD of stable conformers with populations higher than 1% were calculated using density functional theory (TDDFT) at B3LYP/6-31+G(d) level in methanol with IEFPCM model. The calculated ECD curves were all generated using SpecDis 1.71 with  $\sigma = 0.30$  eV, and UV shift -18 nm, respectively.

**Figure S4.** Comparison of the calculated ECD spectra for **1a**, **1b**, **1c**, and **1d** with the experimental spectrum of **1** in methanol with PCM model.

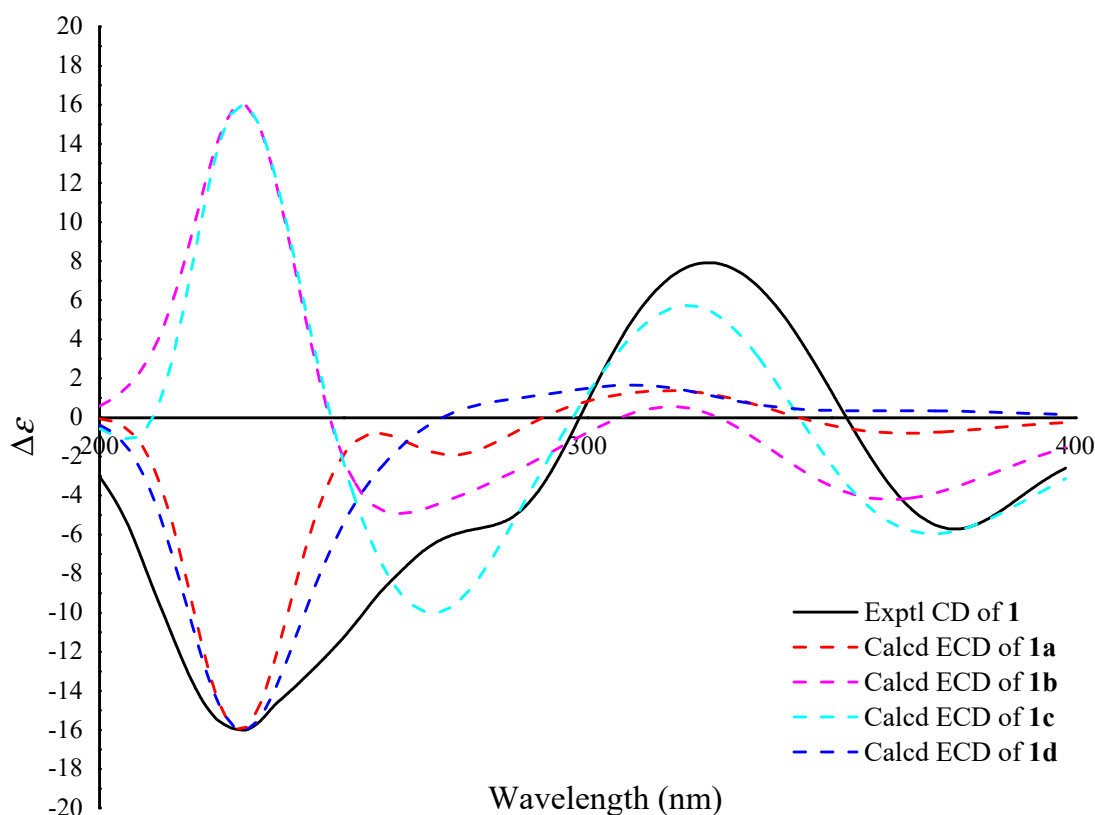

## S2.2. Computational details for compound 1 (NMR)

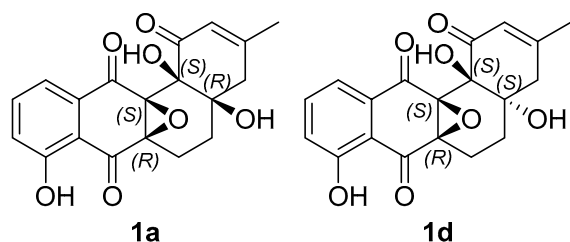

Conformation search based on molecular mechanics with MMFF force fields (Spartan'14, Wavefunction, Inc.) were performed for **1a** and **1d** gave 3 and 2 stable conformers within 20 kJ/mol, respectively. All these conformers were further optimized by the density functional theory method at the B3LYP/6-31G(d) level by Gaussian 16 program package. Gauge Independent Atomic Orbital (GIAO) calculations of their  $^1\text{H}$  and  $^{13}\text{C}$  NMR chemical shifts of stable conformers with populations higher than 1% using density functional theory (DFT) at the mPW1PW91/6-311+G(d,p) level with the PCM model in DMSO. The calculated NMR data of these conformers were averaged according to the Boltzmann distribution theory and their relative Gibbs free energy. The  $^1\text{H}$  and  $^{13}\text{C}$  NMR chemical shifts for TMS were also calculated by the same procedures and used as the reference. After calculation, the experimental and calculated data were evaluated by linear correlation coefficients ( $R^2$ ) and the improved probability DP4+ method.

**Table S3.** Calculated  $^{13}\text{C}$  NMR results for **1a**

| No. | <b>1aA</b> | <b>1aB</b> | <b>1aC</b> | $\delta_{\text{Calcd}}^a$ | $\delta_{\text{Exp}}$ | $\delta_{\text{Corr}}^b$ | Relative errors <sup>c</sup> |
|-----|------------|------------|------------|---------------------------|-----------------------|--------------------------|------------------------------|
| 1   | 51.40      | 51.28      | 50.29      | 137.7                     | 132.4                 | 127.6                    | 4.8                          |
| 2   | 69.33      | 69.42      | 69.74      | 119.8                     | 114.8                 | 110.6                    | 4.2                          |
| 3   | -18.87     | -19.40     | -17.74     | 208.0                     | 194.5                 | 194.2                    | 0.3                          |
| 4   | 118.32     | 119.00     | 115.53     | 70.8                      | 71.6                  | 64.3                     | 7.3                          |
| 5   | 118.37     | 118.53     | 114.07     | 70.7                      | 64.1                  | 64.2                     | -0.1                         |
| 6   | -15.08     | -15.49     | -7.44      | 204.2                     | 192.1                 | 190.6                    | 1.5                          |
| 7   | 61.45      | 61.45      | 61.58      | 127.6                     | 119.2                 | 118.1                    | 1.1                          |
| 8   | 17.30      | 17.46      | 17.85      | 171.8                     | 160.3                 | 159.9                    | 0.4                          |
| 9   | 54.53      | 54.76      | 56.38      | 134.6                     | 125.2                 | 124.7                    | 0.5                          |
| 10  | 42.57      | 42.64      | 42.17      | 146.5                     | 137.2                 | 136.0                    | 1.2                          |
| 11  | 166.64     | 166.60     | 167.09     | 22.5                      | 17.9                  | 18.5                     | -0.6                         |
| 12  | 157.21     | 154.37     | 156.70     | 31.9                      | 27.9                  | 27.4                     | 0.5                          |
| 13  | 108.32     | 107.88     | 104.53     | 80.8                      | 63.5                  | 73.7                     | -10.2                        |

|            |        |        |        |       |       |       |       |
|------------|--------|--------|--------|-------|-------|-------|-------|
| 14         | 104.65 | 104.57 | 107.52 | 84.4  | 75.7  | 77.2  | -1.5  |
| 15         | -19.37 | -19.97 | -18.99 | 208.5 | 196.0 | 194.6 | 1.4   |
| 16         | 59.12  | 59.29  | 58.49  | 130.0 | 122.2 | 120.3 | 1.9   |
| 17         | 140.63 | 140.68 | 142.65 | 48.5  | 41.9  | 43.1  | -1.2  |
| 18         | 8.63   | 10.54  | 13.45  | 180.5 | 156.9 | 168.1 | -11.2 |
| 19         | 160.63 | 160.93 | 161.05 | 28.5  | 23.9  | 24.2  | -0.3  |
| Population | 99.94% | 0.00%  | 0.06%  | RMSD  |       |       | 4.2   |

<sup>a</sup>Weighted average from the calculated shifts; <sup>b</sup>Obtained by linear fit  $\delta_{\text{exp}}$  versus  $\delta_{\text{calcd}}$ ; <sup>c</sup> $\Delta\delta = \delta_{\text{exp}} - \delta_{\text{corr}}$ .

**Table S4.** Calculated <sup>13</sup>C NMR results for **1d**

| No. | <b>1dA</b> | <b>1dB</b> | $\delta_{\text{Calcd}}^a$ | $\delta_{\text{Exp}}$ | $\delta_{\text{Corr}}^b$ | Relative errors <sup>c</sup> |
|-----|------------|------------|---------------------------|-----------------------|--------------------------|------------------------------|
| 1   | 50.20      | 50.50      | 138.6                     | 132.4                 | 129.1                    | 3.3                          |
| 2   | 68.79      | 68.79      | 120.3                     | 114.8                 | 111.6                    | 3.2                          |
| 3   | -19.27     | -19.11     | 208.2                     | 194.5                 | 195.4                    | -0.9                         |
| 4   | 116.89     | 116.76     | 72.3                      | 71.6                  | 65.9                     | 5.7                          |
| 5   | 117.87     | 118.10     | 71.0                      | 64.1                  | 64.7                     | -0.6                         |
| 6   | -11.99     | -12.14     | 201.2                     | 192.1                 | 188.7                    | 3.4                          |
| 7   | 61.95      | 61.88      | 127.2                     | 119.2                 | 118.2                    | 1.0                          |
| 8   | 17.22      | 17.24      | 171.9                     | 160.3                 | 160.7                    | -0.4                         |
| 9   | 55.20      | 55.03      | 134.0                     | 125.2                 | 124.7                    | 0.5                          |
| 10  | 42.45      | 42.50      | 146.6                     | 137.2                 | 136.7                    | 0.5                          |
| 11  | 165.06     | 165.56     | 23.6                      | 17.9                  | 19.5                     | -1.6                         |
| 12  | 158.17     | 159.27     | 30.0                      | 27.9                  | 25.6                     | 2.3                          |
| 13  | 108.01     | 109.14     | 80.1                      | 63.5                  | 73.3                     | -9.8                         |
| 14  | 106.66     | 105.83     | 83.2                      | 75.7                  | 76.2                     | -0.5                         |
| 15  | -18.45     | -18.72     | 207.8                     | 196.0                 | 195.0                    | 1.0                          |
| 16  | 58.09      | 57.12      | 131.9                     | 122.2                 | 122.6                    | -0.4                         |
| 17  | 142.12     | 142.79     | 46.4                      | 41.9                  | 41.2                     | 0.7                          |
| 18  | 15.82      | 13.19      | 175.6                     | 156.9                 | 164.3                    | -7.4                         |
| 19  | 161.29     | 160.90     | 28.1                      | 23.9                  | 23.8                     | 0.1                          |

|            |        |        |      |     |
|------------|--------|--------|------|-----|
| Population | 12.27% | 87.73% | RMSD | 3.5 |
|------------|--------|--------|------|-----|

---

<sup>a</sup>Weighted average from the calculated shifts; <sup>b</sup>Obtained by linear fit  $\delta_{\text{exp}}$  versus  $\delta_{\text{calcd}}$ ; <sup>c</sup> $\Delta\delta = \delta_{\text{exp}} - \delta_{\text{corr}}$ .



**Figure S5.**  $^{13}\text{C}$  NMR calculation results of two possible isomers of **1**. (a) Linear correlation plots of predicted versus experimental  $^{13}\text{C}$  NMR chemical shifts. (b) Relative errors between the predicted  $^{13}\text{C}$  NMR chemical shifts of two potential structures and recorded  $^{13}\text{C}$  NMR data.

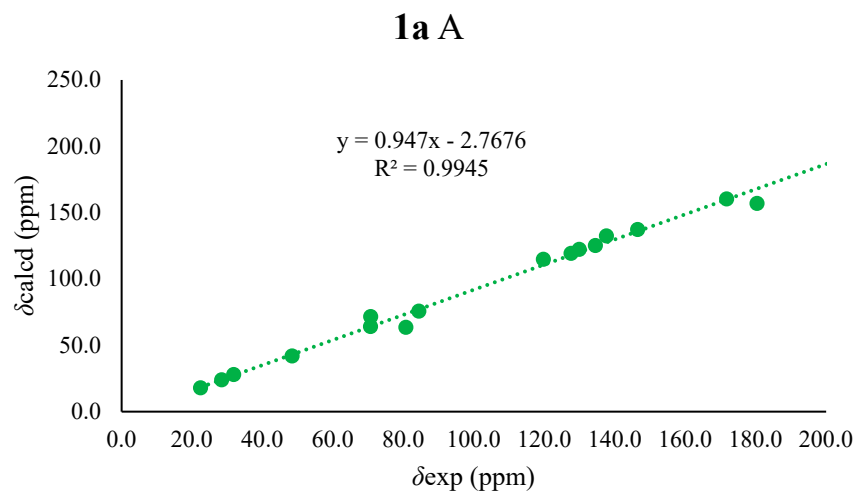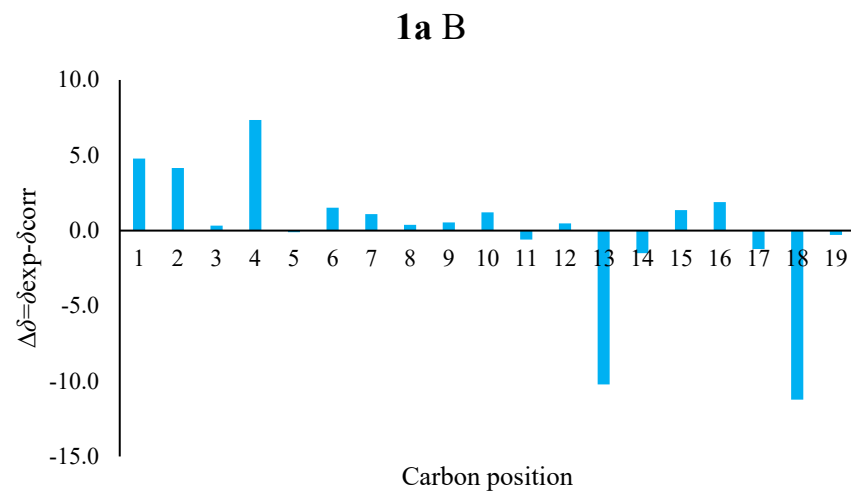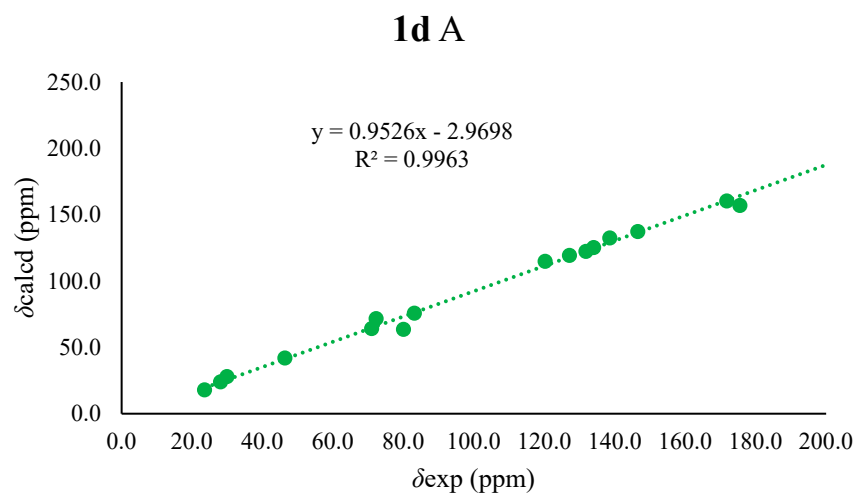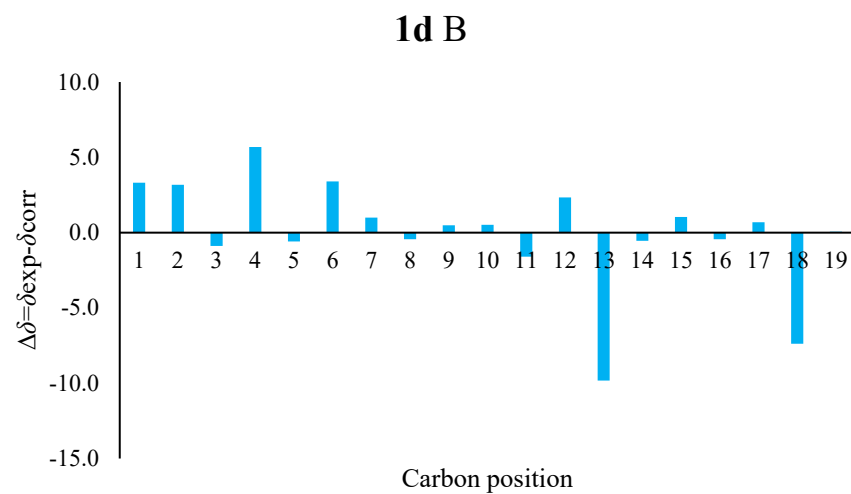

**Table S5.** DP4+ analysis results of **1a** (Isomer 1) and **1d** (Isomer 2)

|    | A          | B    | C           | D        | E             | F        | G                 | H        |
|----|------------|------|-------------|----------|---------------|----------|-------------------|----------|
| 1  | Functional |      | Solvent?    |          | Basis Set     |          | Type of Data      |          |
| 2  | mPW1PW91   |      | PCM         |          | 6-311+G(d, p) |          | Shielding Tensors |          |
| 3  |            |      |             |          |               |          |                   |          |
| 12 |            |      | DP4+        | 0.00%    | 100.00%       | -        | -                 | -        |
| 14 | Nuclei     | sp2? | Experimenta | Isomer 1 | Isomer 2      | Isomer 3 | Isomer 4          | Isomer 5 |
| 15 | C          | x    | 132.4       | 51.4     | 50.5          |          |                   |          |
| 16 | C          | x    | 114.8       | 69.3     | 68.8          |          |                   |          |
| 17 | C          | x    | 194.5       | -18.9    | -19.1         |          |                   |          |
| 18 | C          |      | 71.6        | 118.3    | 116.8         |          |                   |          |
| 19 | C          |      | 64.1        | 118.4    | 118.1         |          |                   |          |
| 20 | C          | x    | 192.1       | -15.1    | -12.1         |          |                   |          |
| 21 | C          | x    | 119.2       | 61.5     | 61.9          |          |                   |          |
| 22 | C          | x    | 160.3       | 17.3     | 17.2          |          |                   |          |
| 23 | C          | x    | 125.2       | 54.5     | 55.1          |          |                   |          |
| 24 | C          | x    | 137.2       | 42.6     | 42.5          |          |                   |          |
| 25 | C          |      | 17.9        | 166.6    | 165.5         |          |                   |          |
| 26 | C          |      | 27.9        | 157.2    | 159.1         |          |                   |          |
| 27 | C          |      | 63.5        | 108.3    | 109.0         |          |                   |          |
| 28 | C          |      | 75.7        | 104.6    | 105.9         |          |                   |          |
| 29 | C          | x    | 196         | -19.4    | -18.7         |          |                   |          |
| 30 | C          | x    | 122.2       | 59.1     | 57.2          |          |                   |          |
| 31 | C          |      | 41.9        | 140.6    | 142.7         |          |                   |          |
| 32 | C          | x    | 156.9       | 8.6      | 13.5          |          |                   |          |
| 33 | C          |      | 23.9        | 160.6    | 161.0         |          |                   |          |

|    | A                | B | C        | D        | E             | F        | G                 | H        |
|----|------------------|---|----------|----------|---------------|----------|-------------------|----------|
| 1  | Functional       |   | Solvent? |          | Basis Set     |          | Type of Data      |          |
| 2  | mPW1PW91         |   | PCM      |          | 6-311+G(d, p) |          | Shielding Tensors |          |
| 3  |                  |   |          |          |               |          |                   |          |
| 4  |                  |   | Isomer 1 | Isomer 2 | Isomer 3      | Isomer 4 | Isomer 5          | Isomer 6 |
| 5  | sDP4+ (H data)   |   | -        | -        | -             | -        | -                 | -        |
| 6  | sDP4+ (C data)   |   | 6.00%    | 94.00%   | -             | -        | -                 | -        |
| 7  | sDP4+ (all data) |   | 6.00%    | 94.00%   | -             | -        | -                 | -        |
| 8  | uDP4+ (H data)   |   | -        | -        | -             | -        | -                 | -        |
| 9  | uDP4+ (C data)   |   | 0.00%    | 100.00%  | -             | -        | -                 | -        |
| 10 | uDP4+ (all data) |   | 0.00%    | 100.00%  | -             | -        | -                 | -        |
| 11 | DP4+ (H data)    |   | -        | -        | -             | -        | -                 | -        |
| 12 | DP4+ (C data)    |   | 0.00%    | 100.00%  | -             | -        | -                 | -        |
| 13 | DP4+ (all data)  |   | 0.00%    | 100.00%  | -             | -        | -                 | -        |

## Section S3. Computational details for 2

### S3.1. Computational details for compound 2 (NMR)

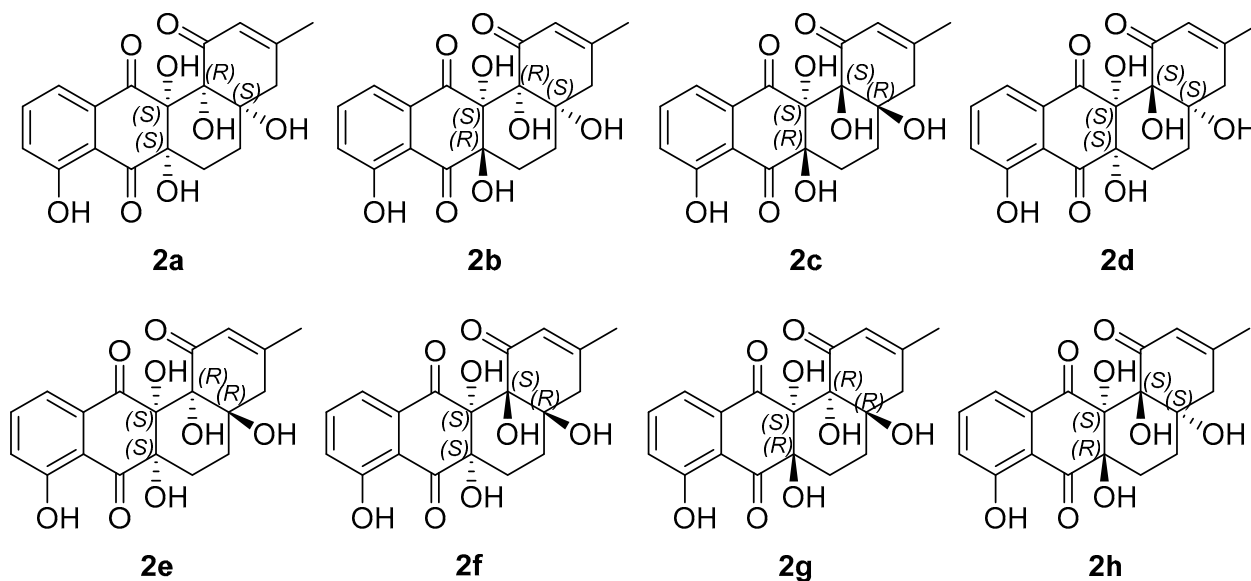

Conformation search based on molecular mechanics with MMFF force fields (Spartan'14, Wavefunction, Inc.) were performed for **2a**, **2b**, **2c**, **2d**, **2e**, **2f**, **2g** and **2h** gave 5, 3, 1, 4, 2, 1, 2 and 4 stable conformers within 20 kJ/mol, respectively. All these conformers were further optimized by the density functional theory method at the B3LYP/6-31G(d) level by Gaussian 16 program package. Gauge Independent Atomic Orbital (GIAO) calculations of their  $^1\text{H}$  and  $^{13}\text{C}$  NMR chemical shifts of stable conformers with populations higher than 1% using density functional theory (DFT) at the mPW1PW91/6-311+G(d,p) level with the PCM model in DMSO. The calculated NMR data of these conformers were averaged according to the Boltzmann distribution theory and their relative Gibbs free energy. The  $^1\text{H}$  and  $^{13}\text{C}$  NMR chemical shifts for TMS were also calculated by the same procedures and used as the reference. After calculation, the experimental and calculated data were evaluated by linear correlation coefficients ( $R^2$ ) and the improved probability DP4+ method.

**Table S6.** DP4+ analysis results of **2a** (Isomer 1), **2b** (Isomer 2), **2c** (Isomer 3), **2d** (Isomer 4), **2e** (Isomer 5), **2f** (Isomer 6), **2g** (Isomer 7), and **2h** (Isomer 8)

|    | A          | B    | C            | D        | E             | F        | G                 | H        | I        | J        | K        |
|----|------------|------|--------------|----------|---------------|----------|-------------------|----------|----------|----------|----------|
| 1  | Functional |      | Solvent?     |          | Basis Set     |          | Type of Data      |          |          |          |          |
| 2  | mPW1PW91   |      | PCM          |          | 6-311+G(d, p) |          | Shielding Tensors |          |          |          |          |
| 3  |            |      |              |          |               |          |                   |          |          |          |          |
| 12 |            |      | DP4+         | 0.00%    | 23.61%        | 0.00%    | 0.00%             | 0.00%    | 0.00%    | 67.24%   | 9.15%    |
| 14 | Nuclei     | sp2? | Experimental | Isomer 1 | Isomer 2      | Isomer 3 | Isomer 4          | Isomer 5 | Isomer 6 | Isomer 7 | Isomer 8 |
| 15 | C          | x    | 136.2        | 42.0     | 43.4          | 43.3     | 43.3              | 41.4     | 42.0     | 42.6     | 42.8     |
| 16 | C          | x    | 123.6        | 56.2     | 54.4          | 55.5     | 55.3              | 55.4     | 54.7     | 55.7     | 55.6     |
| 17 | C          | x    | 159.9        | 18.5     | 17.8          | 18.3     | 18.2              | 18.5     | 18.7     | 17.3     | 18.1     |
| 18 | C          | x    | 116.3        | 69.9     | 67.3          | 67.7     | 64.0              | 69.4     | 68.8     | 67.9     | 67.7     |
| 19 | C          | x    | 133          | 46.1     | 50.8          | 49.0     | 48.1              | 48.7     | 49.1     | 50.4     | 47.8     |
| 20 | C          | x    | 118.8        | 62.0     | 61.1          | 61.6     | 62.3              | 60.8     | 60.2     | 61.8     | 62.3     |
| 21 | C          | x    | 194.1        | -25.7    | -22.6         | -23.2    | -18.5             | -25.6    | -26.2    | -21.9    | -21.2    |
| 22 | C          |      | 77.6         | 104.5    | 106.3         | 104.8    | 103.3             | 101.9    | 102.2    | 106.9    | 103.3    |
| 23 | C          |      | 76.2         | 98.0     | 108.5         | 105.4    | 98.8              | 103.5    | 106.2    | 110.1    | 103.9    |
| 24 | C          | x    | 192.8        | -18.4    | -19.4         | -25.1    | -21.5             | -17.1    | -20.5    | -17.6    | -24.2    |
| 25 | C          |      | 21.6         | 151.1    | 163.4         | 159.0    | 159.7             | 151.1    | 150.9    | 156.9    | 162.2    |
| 26 | C          |      | 28.2         | 153.4    | 158.4         | 159.3    | 153.0             | 155.8    | 156.0    | 155.6    | 156.5    |
| 27 | C          |      | 75.4         | 112.9    | 104.7         | 107.4    | 108.1             | 107.4    | 107.2    | 106.7    | 106.6    |
| 28 | C          |      | 109.5        | 111.8    | 105.4         | 103.6    | 105.2             | 111.4    | 108.7    | 103.0    | 106.5    |
| 29 | C          |      | 41.8         | 139.8    | 140.8         | 141.0    | 142.6             | 141.8    | 141.7    | 141.9    | 142.0    |
| 30 | C          | x    | 158.2        | 11.0     | 8.0           | 7.0      | 7.8               | 5.4      | 6.7      | 13.9     | 9.6      |
| 31 | C          | x    | 122.8        | 56.6     | 57.6          | 57.2     | 59.1              | 58.2     | 57.5     | 56.3     | 59.0     |
| 32 | C          | x    | 200.5        | -20.7    | -20.8         | -19.8    | -14.5             | -19.4    | -20.2    | -16.3    | -23.9    |
| 33 | C          |      | 23.6         | 159.9    | 160.3         | 160.3    | 159.8             | 158.9    | 159.9    | 161.2    | 160.7    |

|    | A                | B     | C        | D        | E             | F        | G                 | H        | I        | J        |
|----|------------------|-------|----------|----------|---------------|----------|-------------------|----------|----------|----------|
| 1  | Functional       |       | Solvent? |          | Basis Set     |          | Type of Data      |          |          |          |
| 2  | mPW1PW91         |       | PCM      |          | 6-311+G(d, p) |          | Shielding Tensors |          |          |          |
| 3  |                  |       |          |          |               |          |                   |          |          |          |
| 4  |                  |       | Isomer 1 | Isomer 2 | Isomer 3      | Isomer 4 | Isomer 5          | Isomer 6 | Isomer 7 | Isomer 8 |
| 5  | sDP4+ (H data)   |       | —        | —        | —             | —        | —                 | —        | —        | —        |
| 6  | sDP4+ (C data)   | 0.00% | 8.58%    | 0.60%    | 0.34%         | 0.00%    | 0.02%             | 0.08%    | 90.39%   |          |
| 7  | sDP4+ (all data) | 0.00% | 8.58%    | 0.60%    | 0.34%         | 0.00%    | 0.02%             | 0.08%    | 90.39%   |          |
| 8  | uDP4+ (H data)   |       | —        | —        | —             | —        | —                 | —        | —        | —        |
| 9  | uDP4+ (C data)   | 0.00% | 0.31%    | 0.00%    | 0.00%         | 0.00%    | 0.00%             | 99.68%   | 0.01%    |          |
| 10 | uDP4+ (all data) | 0.00% | 0.31%    | 0.00%    | 0.00%         | 0.00%    | 0.00%             | 99.68%   | 0.01%    |          |
| 11 | DP4+ (H data)    |       | —        | —        | —             | —        | —                 | —        | —        | —        |
| 12 | DP4+ (C data)    | 0.00% | 23.61%   | 0.00%    | 0.00%         | 0.00%    | 0.00%             | 67.24%   | 9.15%    |          |
| 13 | DP4+ (all data)  | 0.00% | 23.61%   | 0.00%    | 0.00%         | 0.00%    | 0.00%             | 67.24%   | 9.15%    |          |

### S3.2. Computational details for compound **2** (ECD)

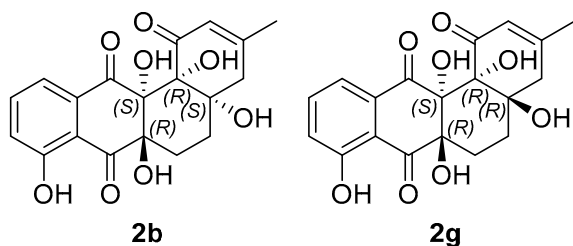

Conformation search based on molecular mechanics with MMFF force fields (Spartan'14, Wavefunction, Inc.) were performed for **2b** and **2g** gave 3 and 2 stable conformers within 20 kJ/mol, respectively. All these conformers were further optimized by the density functional theory method at the B3LYP/6-31G(d) level by Gaussian 16 program package. The ECD of stable conformers with populations higher than 1% were calculated using density functional theory (TDDFT) at B3LYP/6-31+G(d) level in methanol with IEFPCM model. The calculated ECD curves were all generated using SpecDis 1.71 with  $\sigma = 0.22$  eV, and UV shift -25 and +5 nm, respectively.

**Figure S6.** Comparison of the calculated ECD spectra for **2b** and **2g** with the experimental spectrum of **2** in methanol with PCM model.

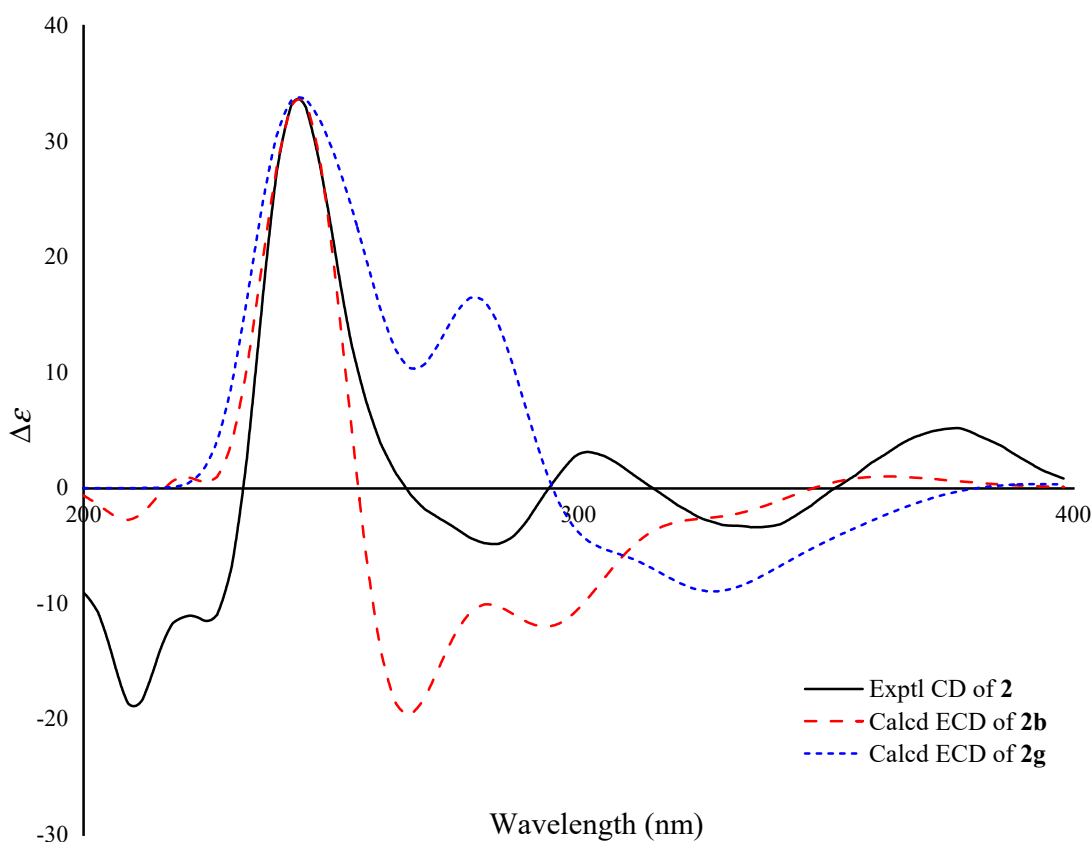

## Section S4. NMR, HRESIMS, and IR spectra of 1

Figure S7.  $^1\text{H}$  NMR of 1 in  $\text{DMSO}-d_6$

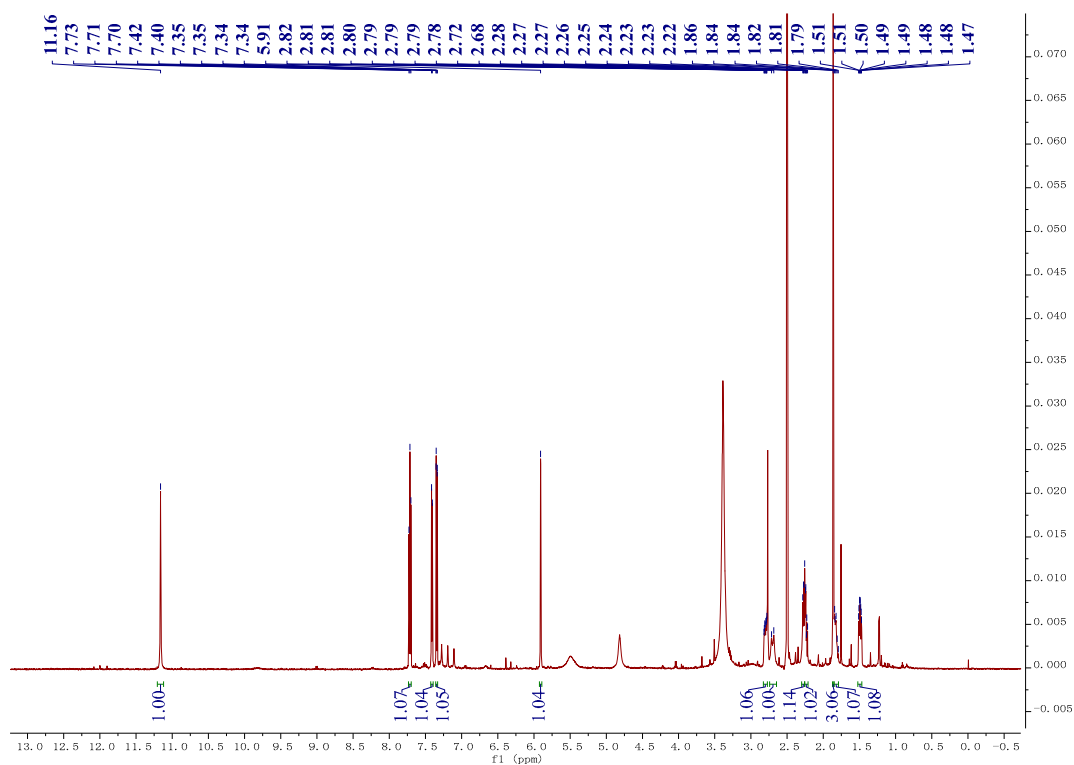

Figure S8.  $^{13}\text{C}$  NMR of 1 in  $\text{DMSO}-d_6$

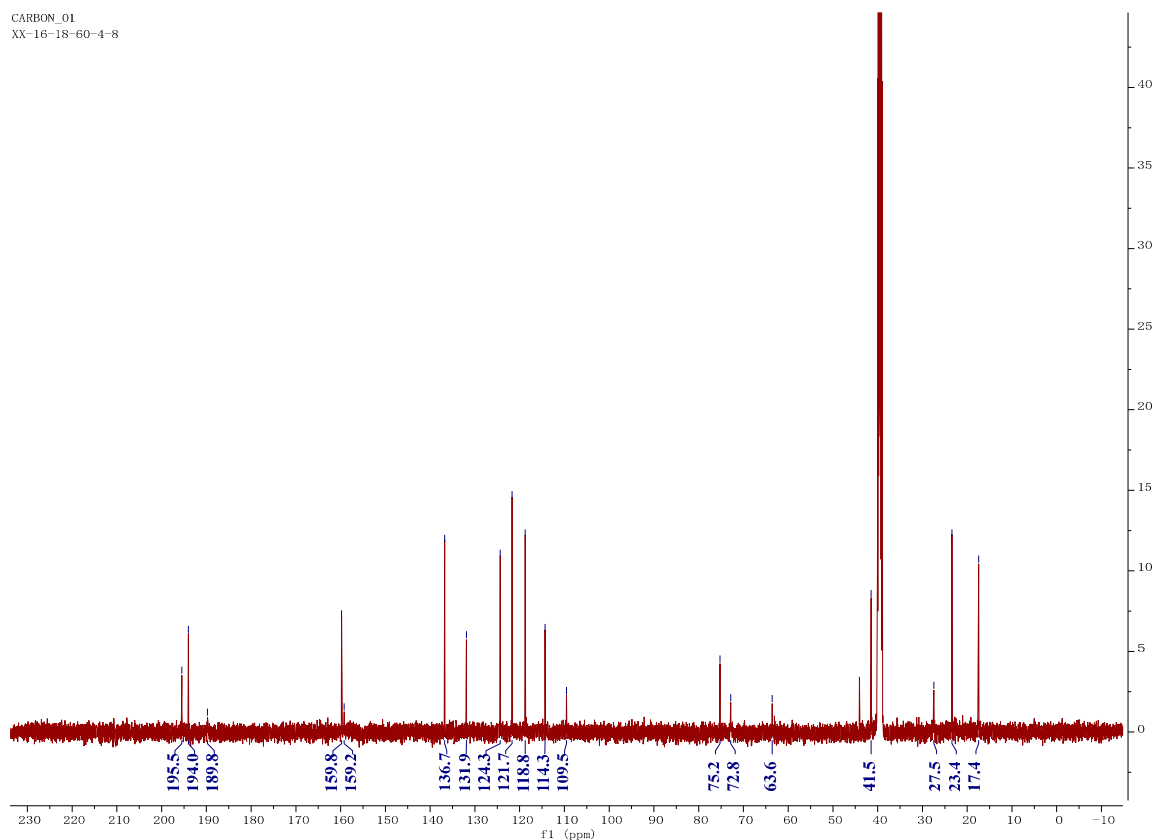

**Figure S9.** HSQC of **1** in DMSO-*d*<sub>6</sub>

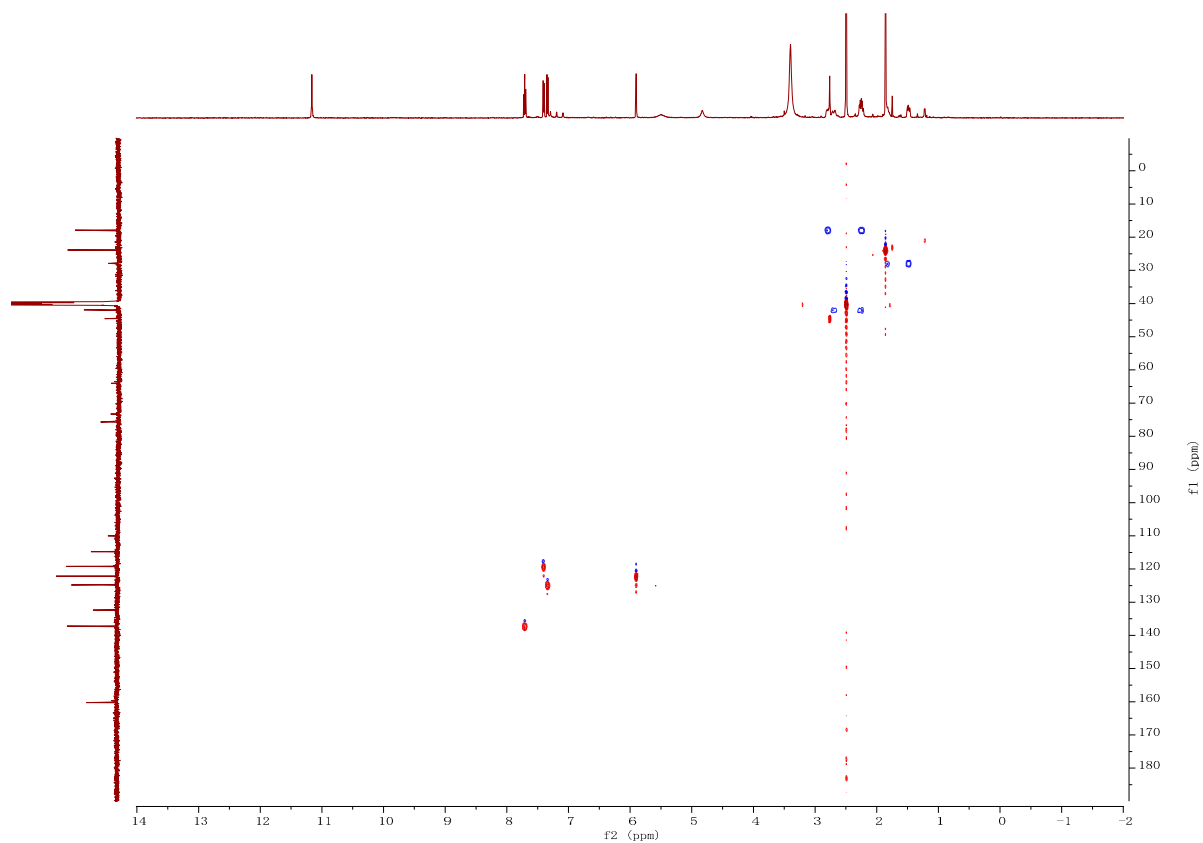

**Figure S10.** HMBC of **1** in DMSO-*d*<sub>6</sub>

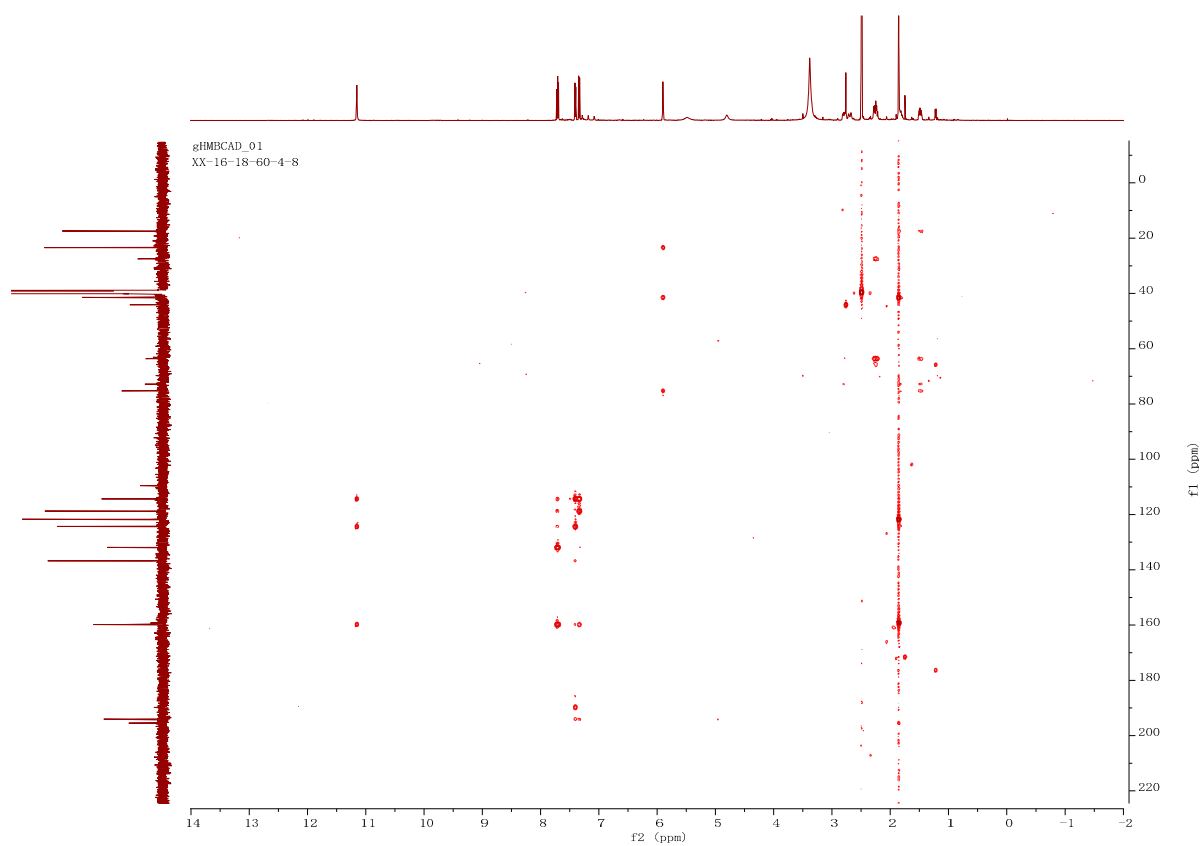

**Figure S11.**  $^1\text{H}$ - $^1\text{H}$  COSY of **1** in  $\text{DMSO}-d_6$

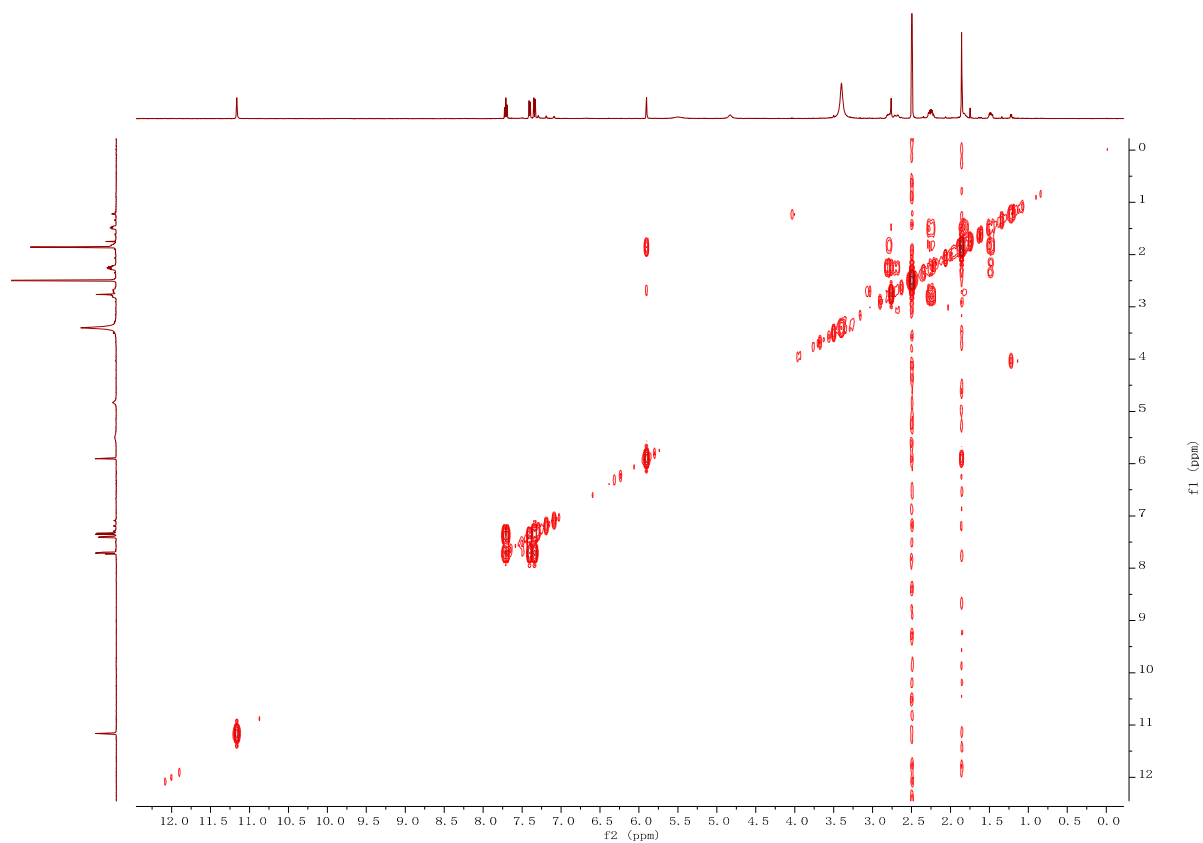

**Figure S12.** HRESIMS of **1**



20210518-XX-168-60-4-8\_210518081718 #44 RT: 0.69 AV: 1 NL: 2.62E6  
T: FTMS - p ESI sid=45.00 Full ms [150.00-2000.00]

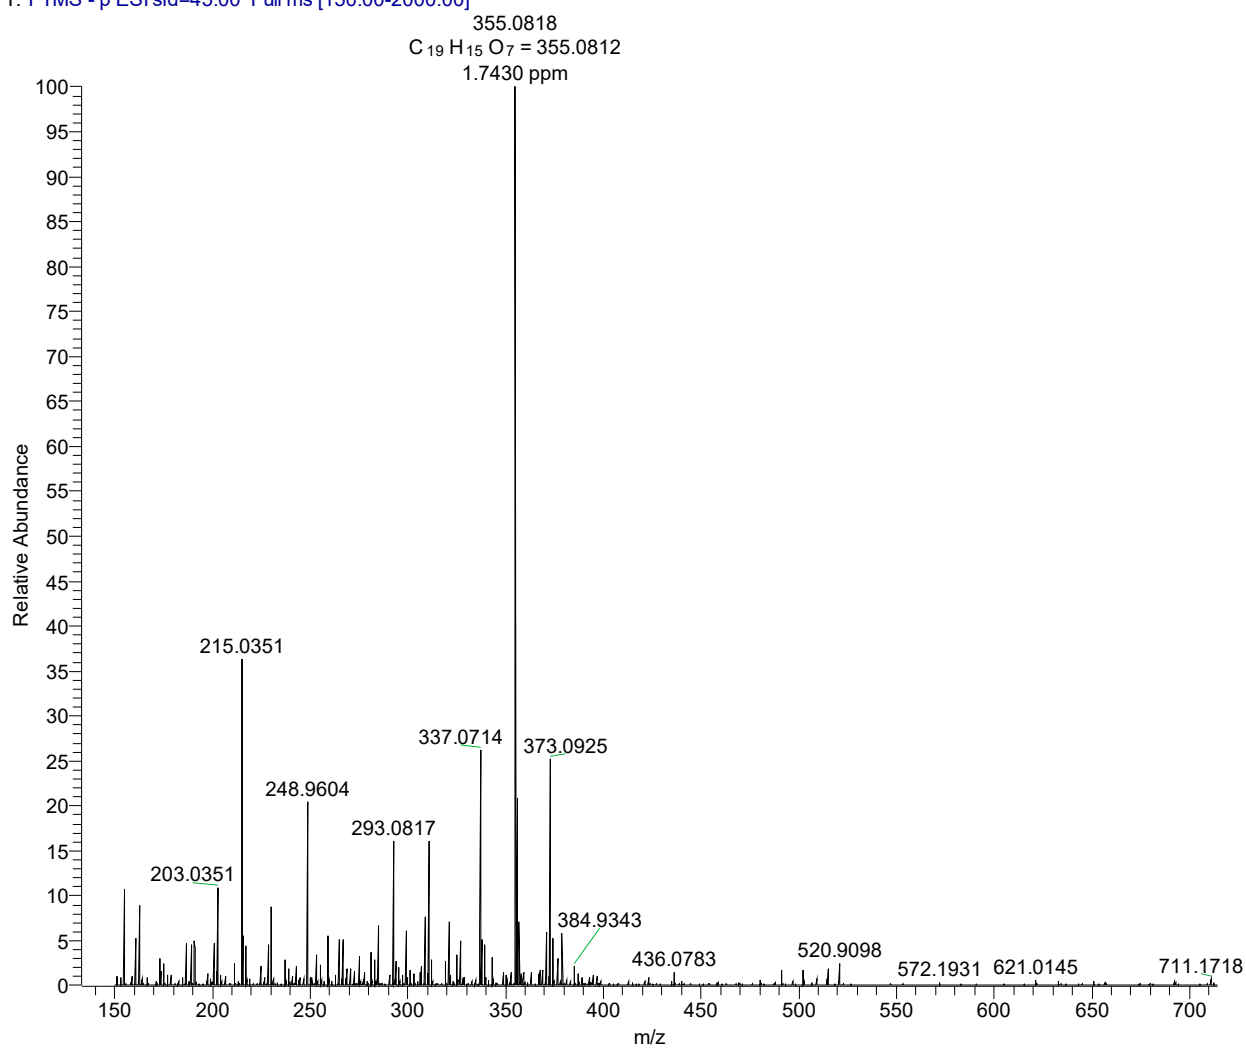

Figure S13. IR of 1

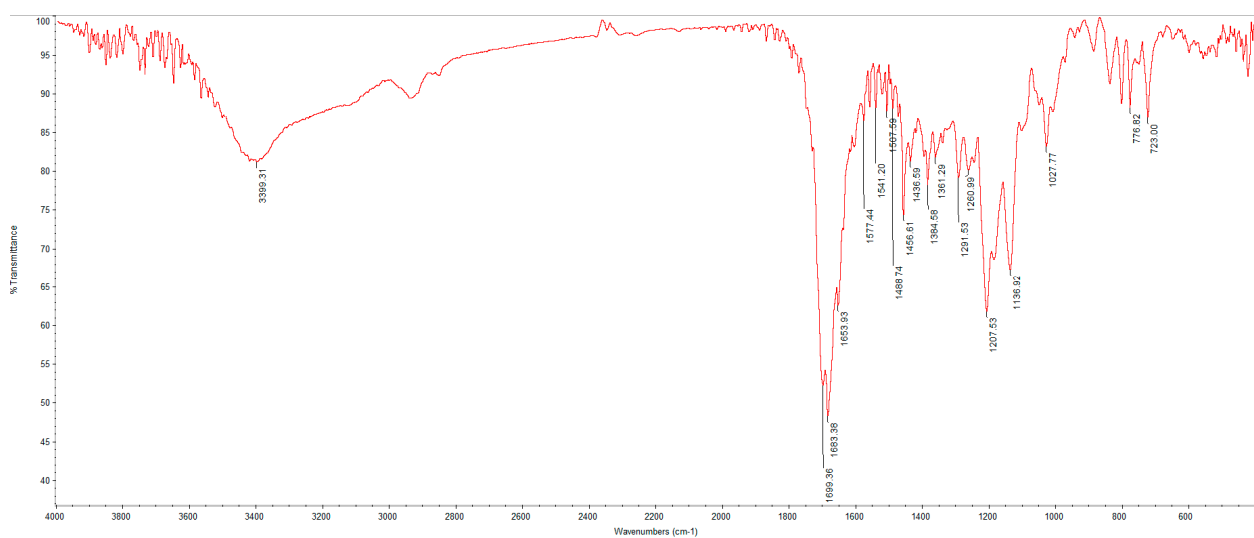

## Section S5. NMR, HRESIMS, and IR spectra of 2

Figure S14.  $^1\text{H}$  NMR of 2 in  $\text{DMSO}-d_6$

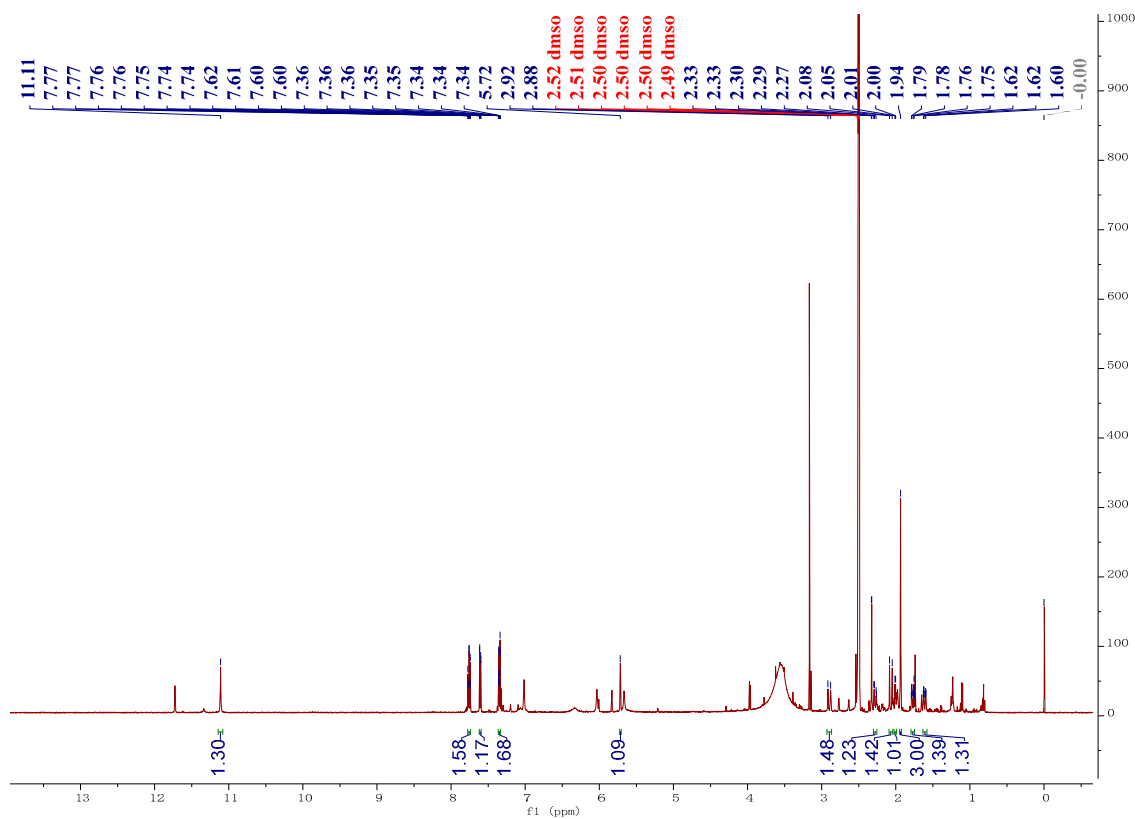

Figure S15.  $^{13}\text{C}$  NMR of 2 in  $\text{DMSO}-d_6$

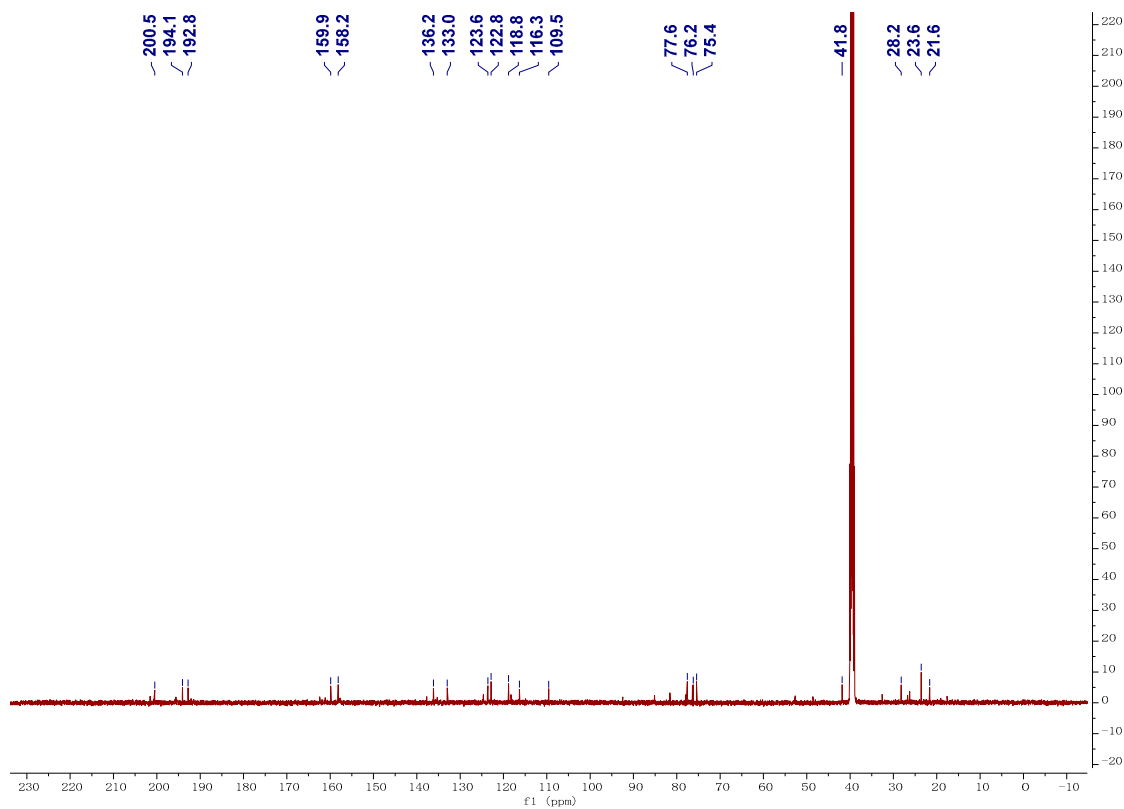

**Figure S16.** HSQC of **2** in DMSO-*d*<sub>6</sub>

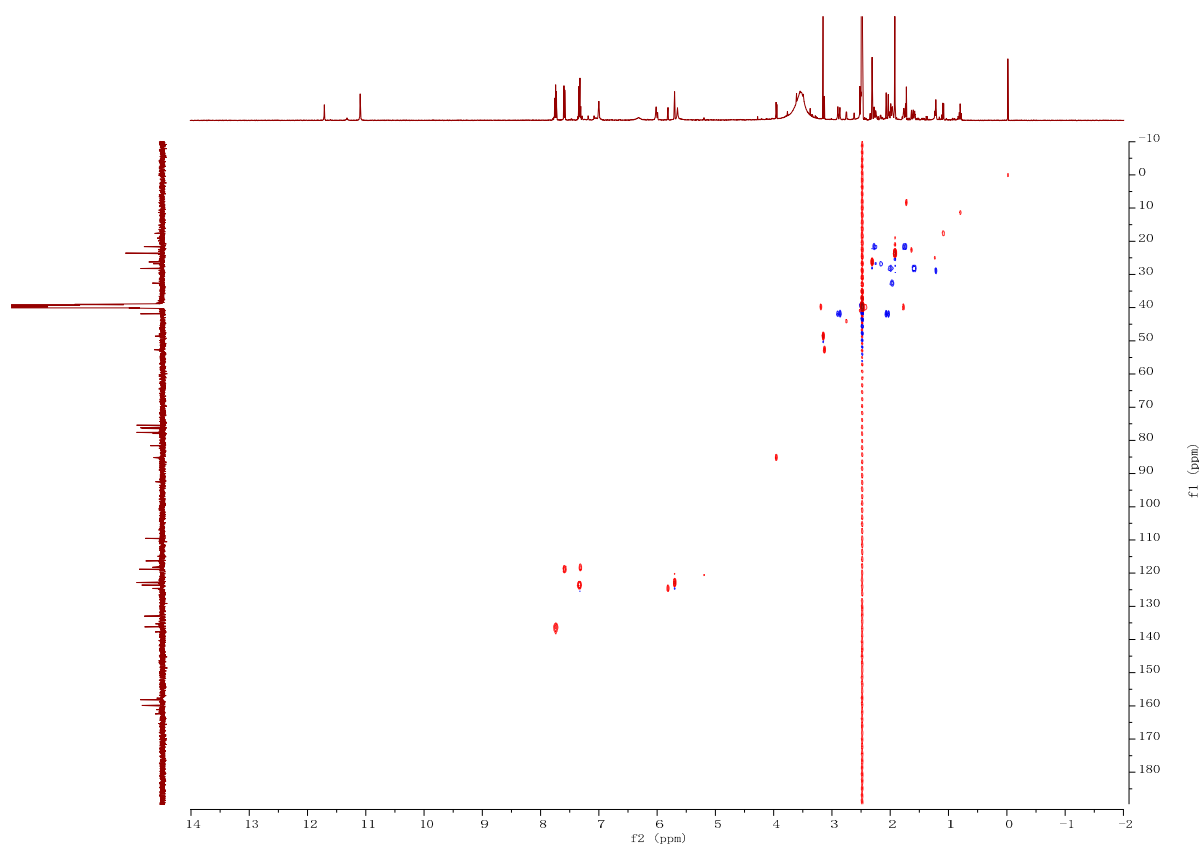

**Figure S17.** HMBC of **2** in DMSO-*d*<sub>6</sub>

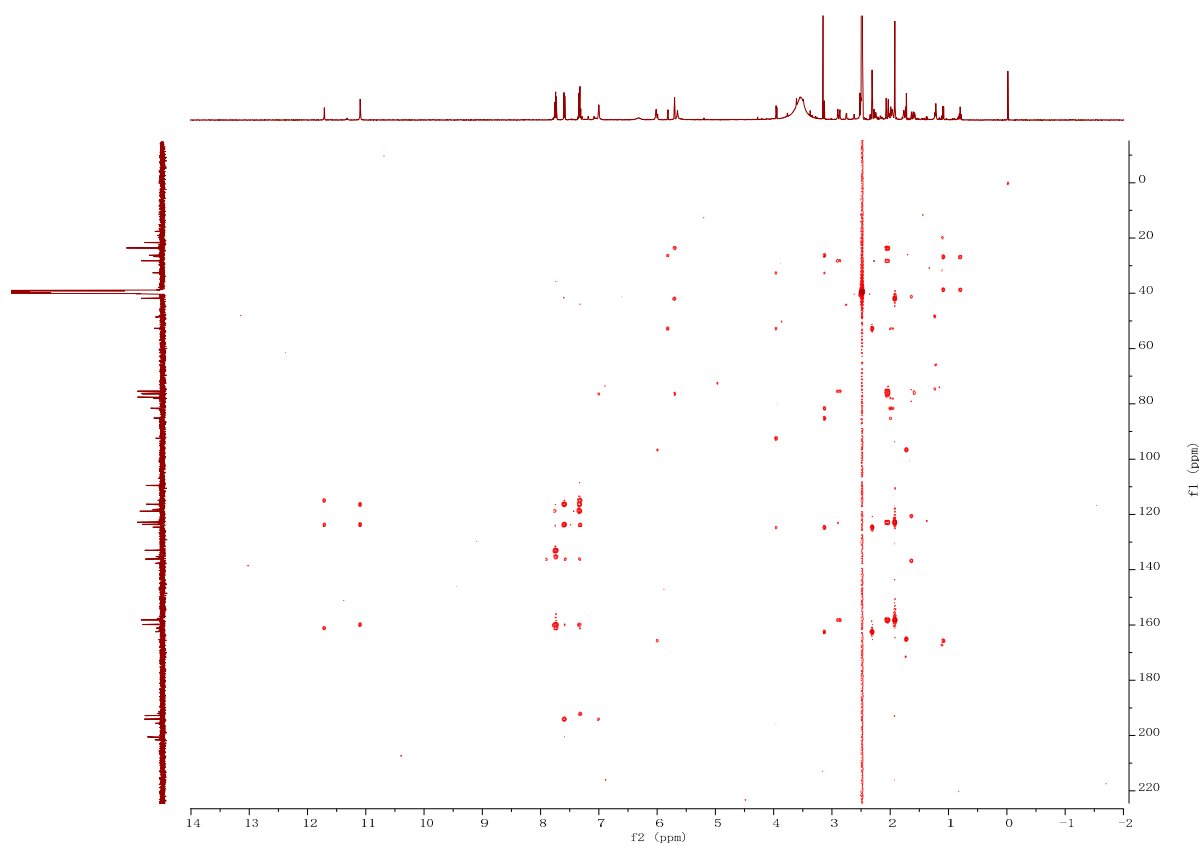

**Figure S18.**  $^1\text{H}$ - $^1\text{H}$  COSY of **2** in  $\text{DMSO}-d_6$

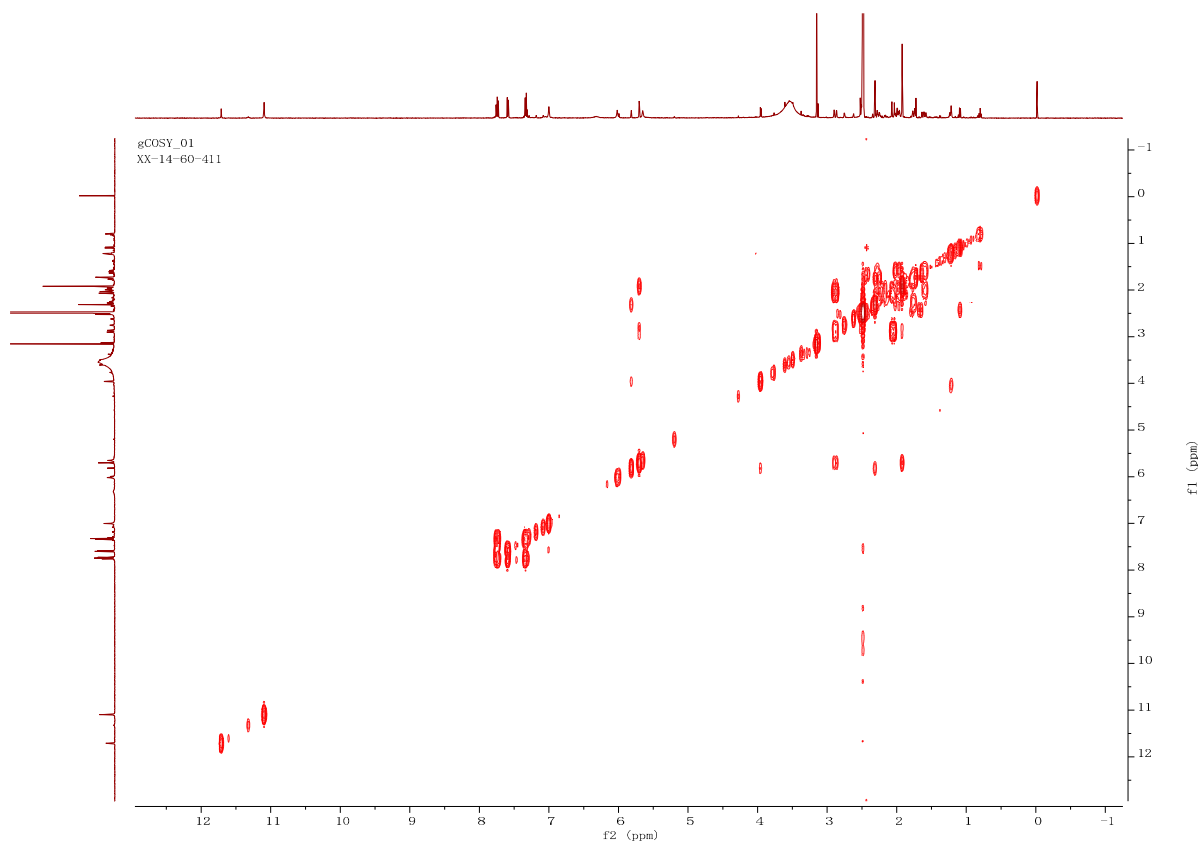

**Figure S19.** HRESIMS of **2**

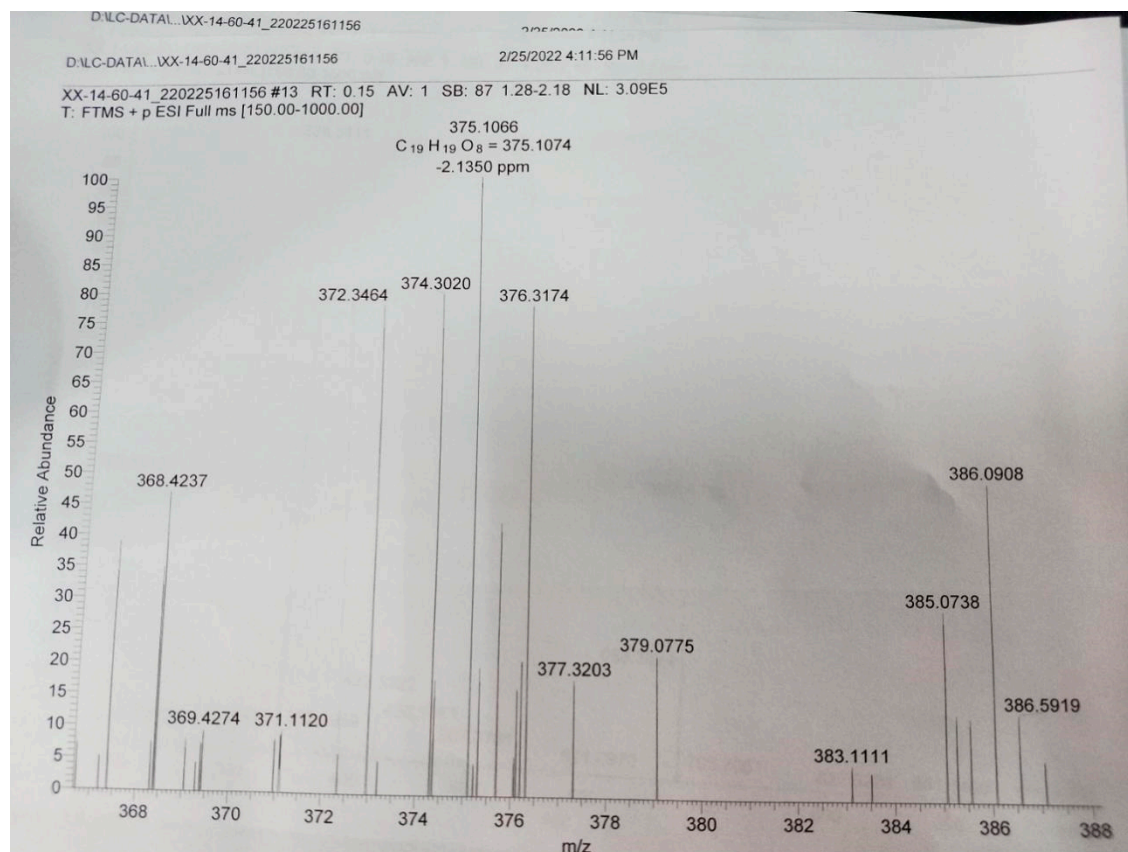

**Figure S20.** IR of 2

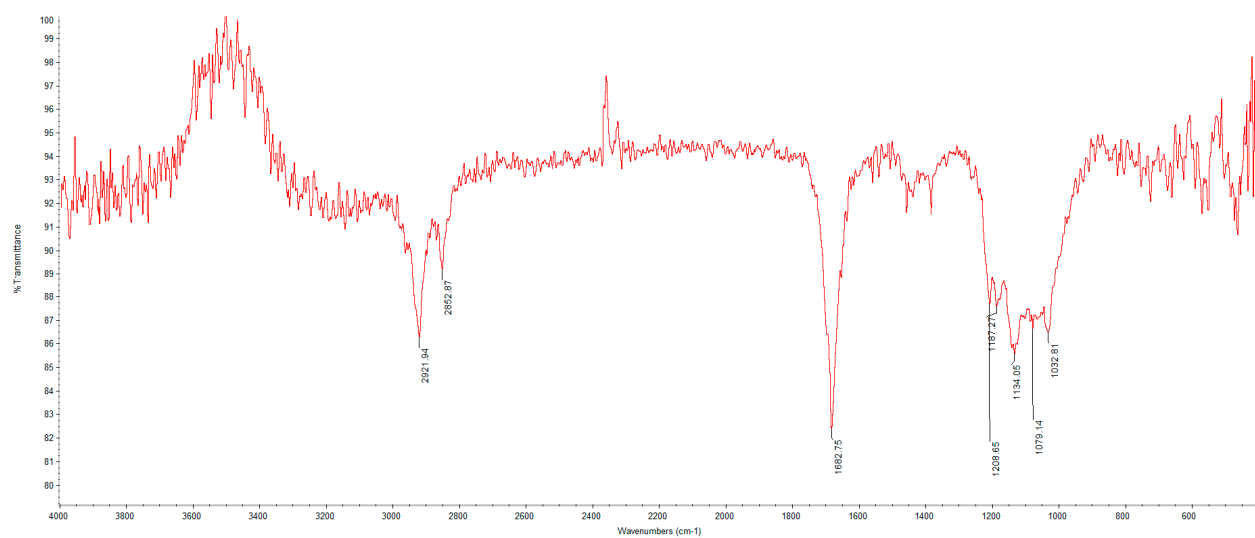

## Section S6. NMR, HRESIMS, and IR spectra of **3**

**Figure S21.**  $^1\text{H}$  NMR of **3** in  $\text{DMSO}-d_6$

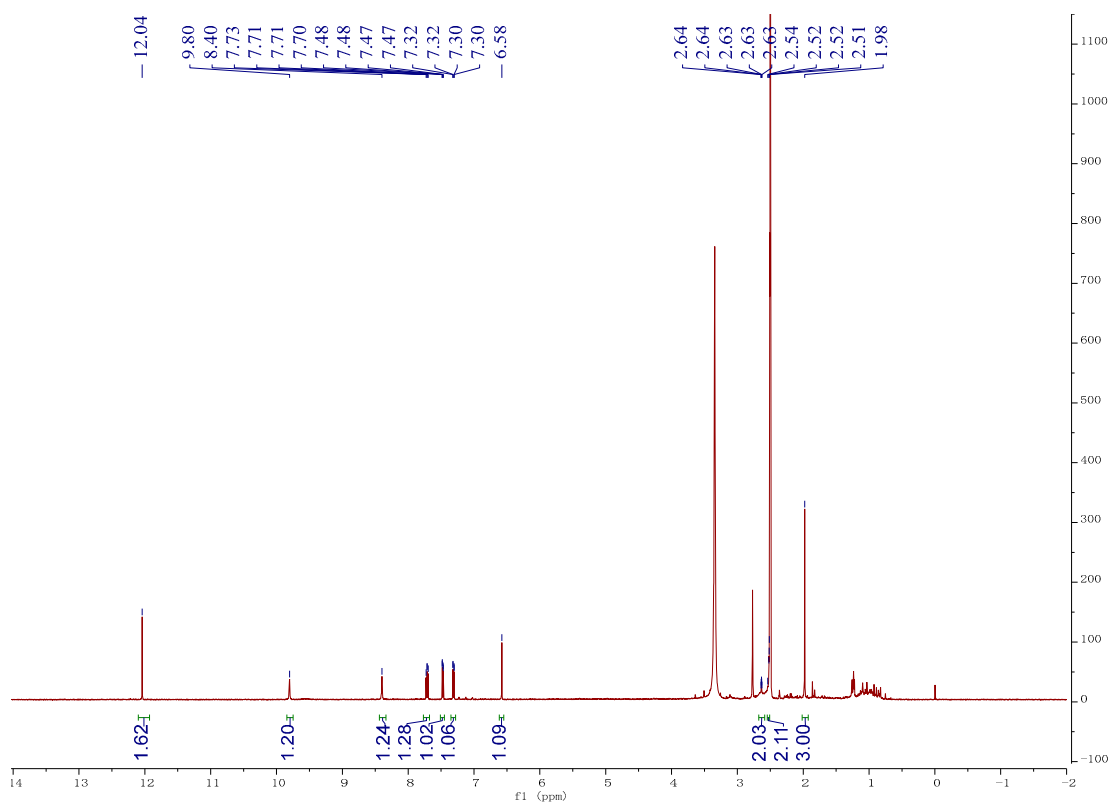

**Figure S22.**  $^{13}\text{C}$  NMR of **3** in  $\text{DMSO}-d_6$

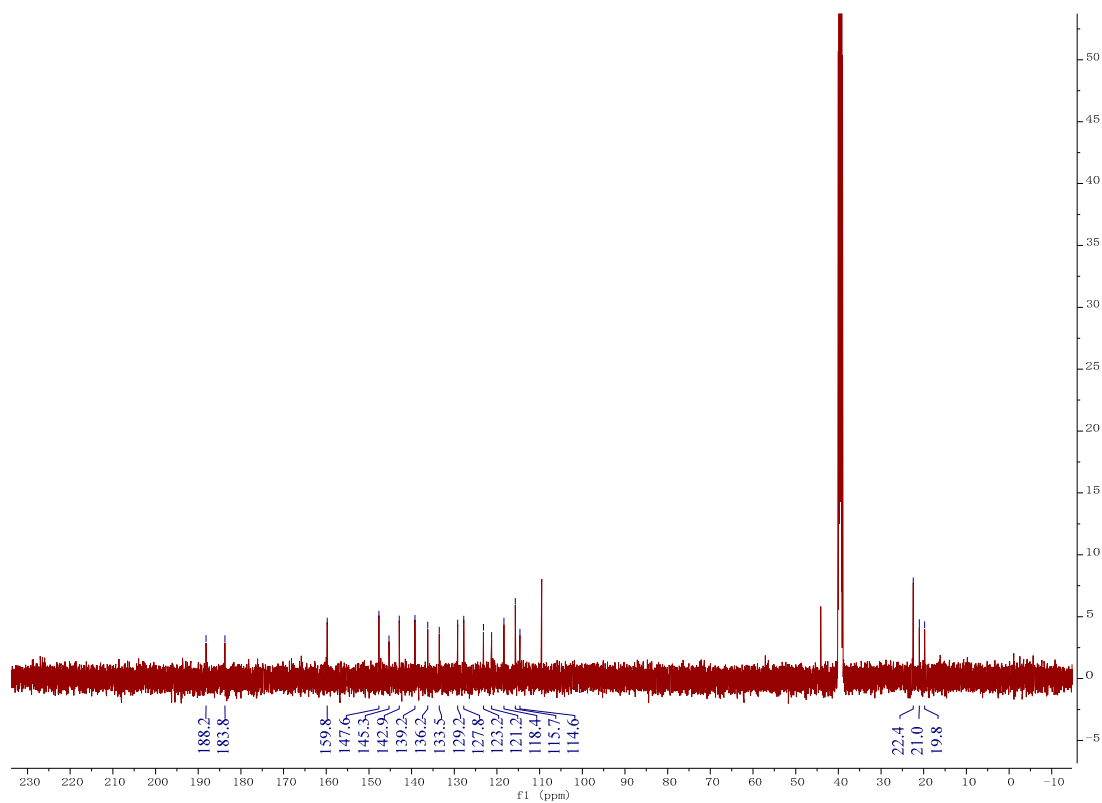

**Figure S23.** HSQC of **3** in DMSO-*d*<sub>6</sub>

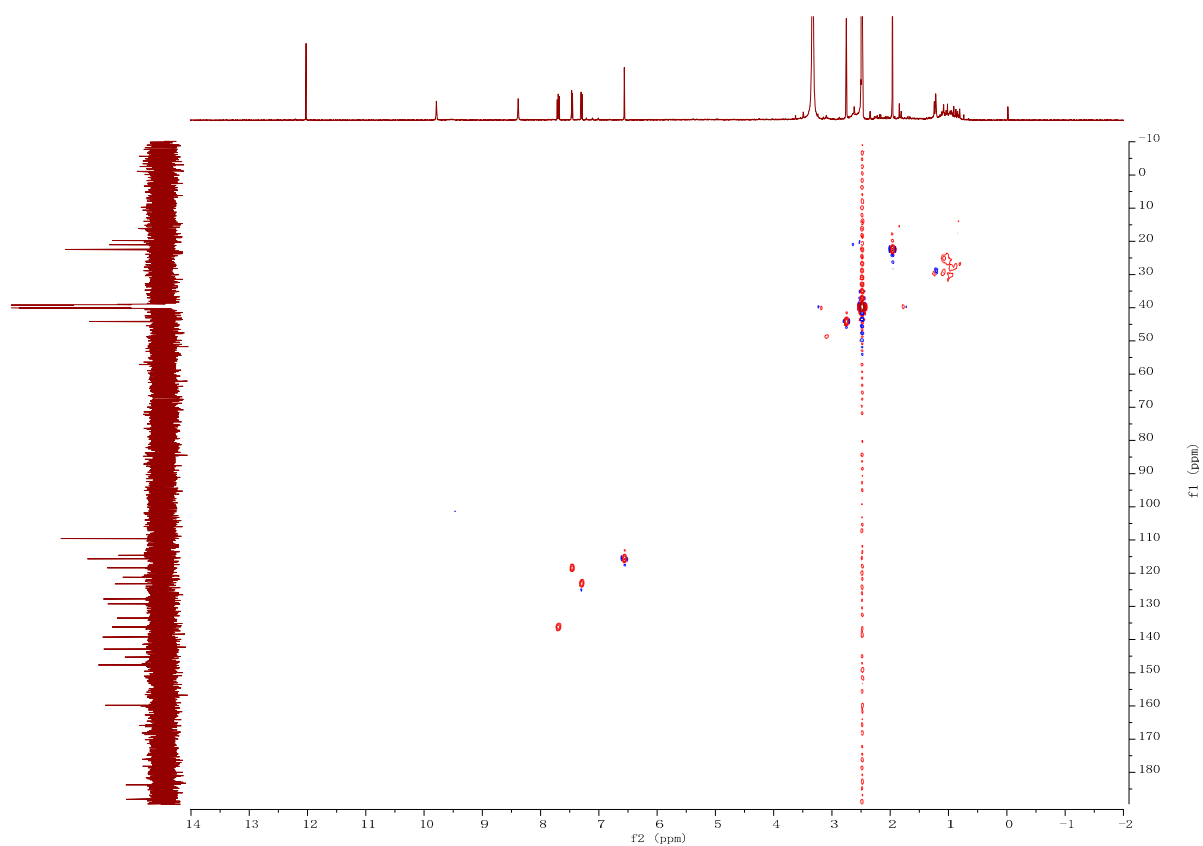

**Figure S24.** HMBC of **3** in DMSO-*d*<sub>6</sub>

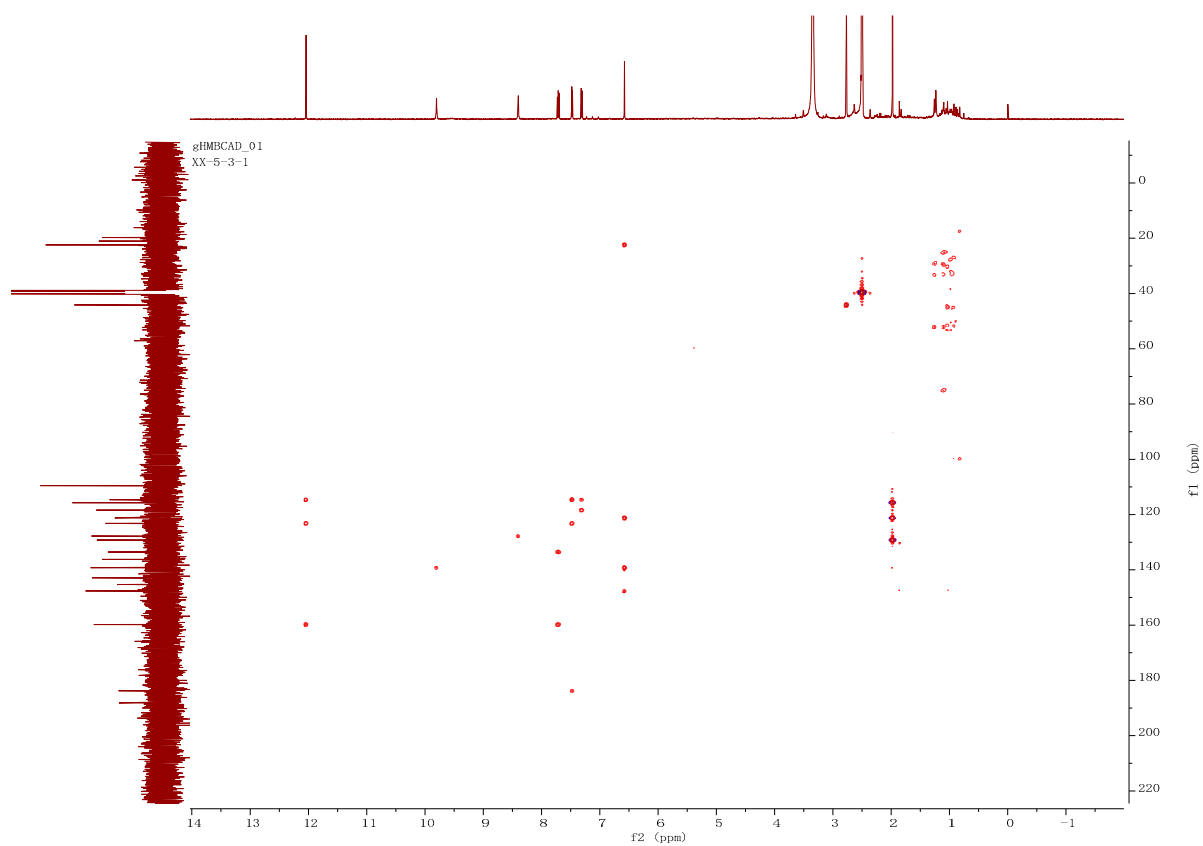

**Figure S25.**  $^1\text{H}$ - $^1\text{H}$  COSY of **3** in  $\text{DMSO}-d_6$

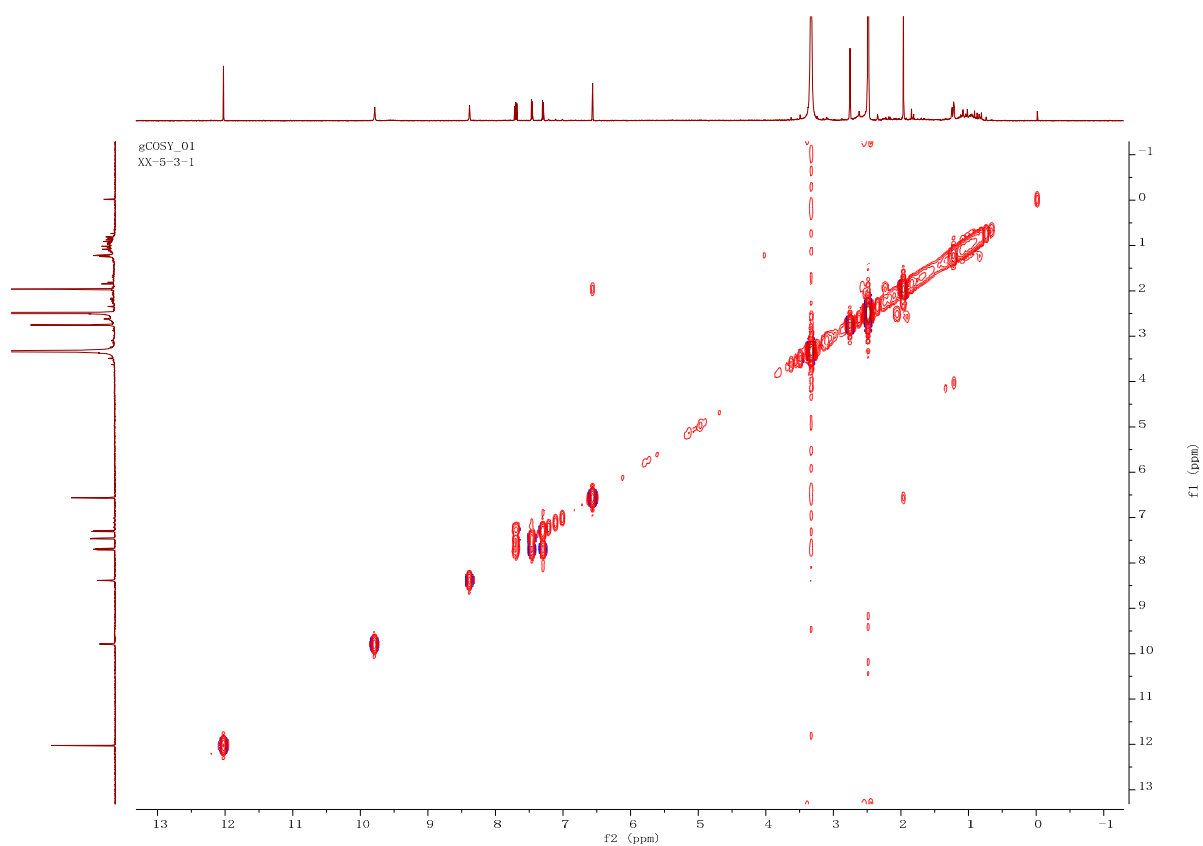

**Figure S26.** NOESY of **3** in  $\text{DMSO}-d_6$

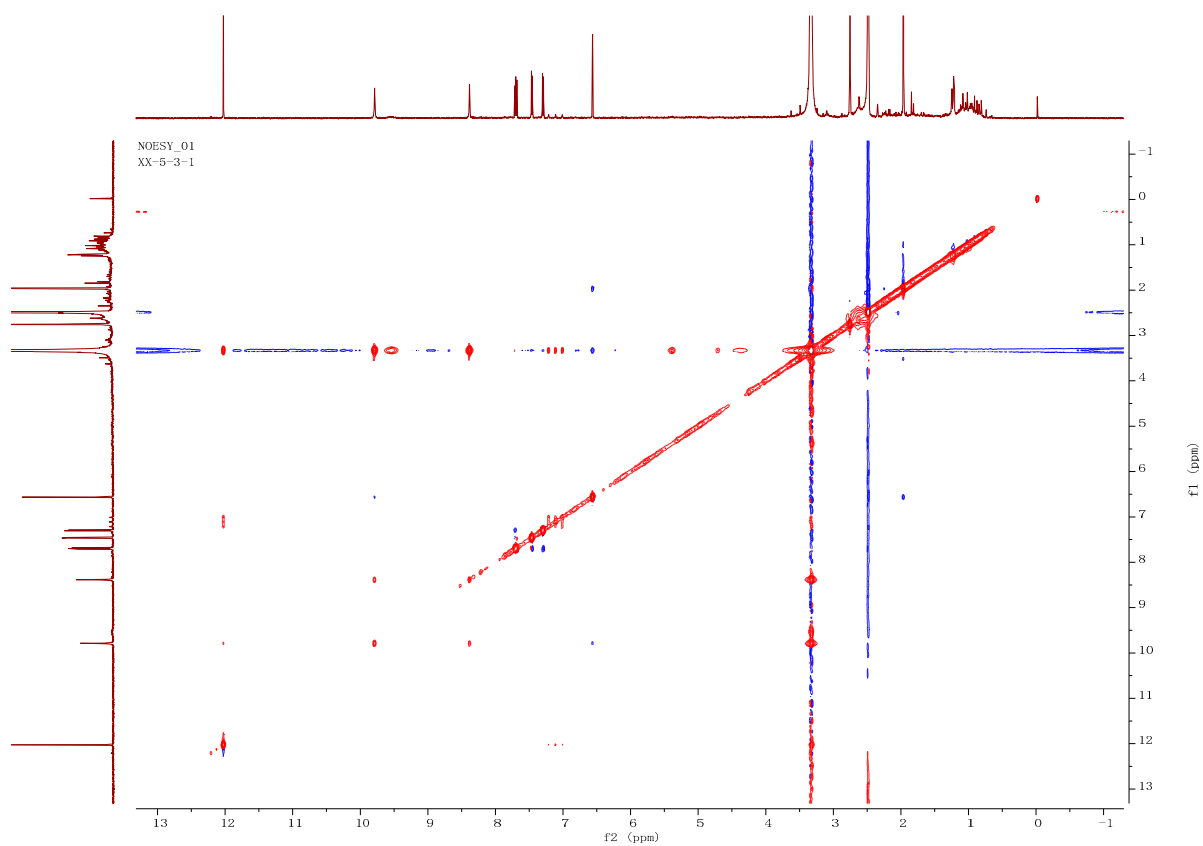



**Figure S27. HRESIMS of 3**

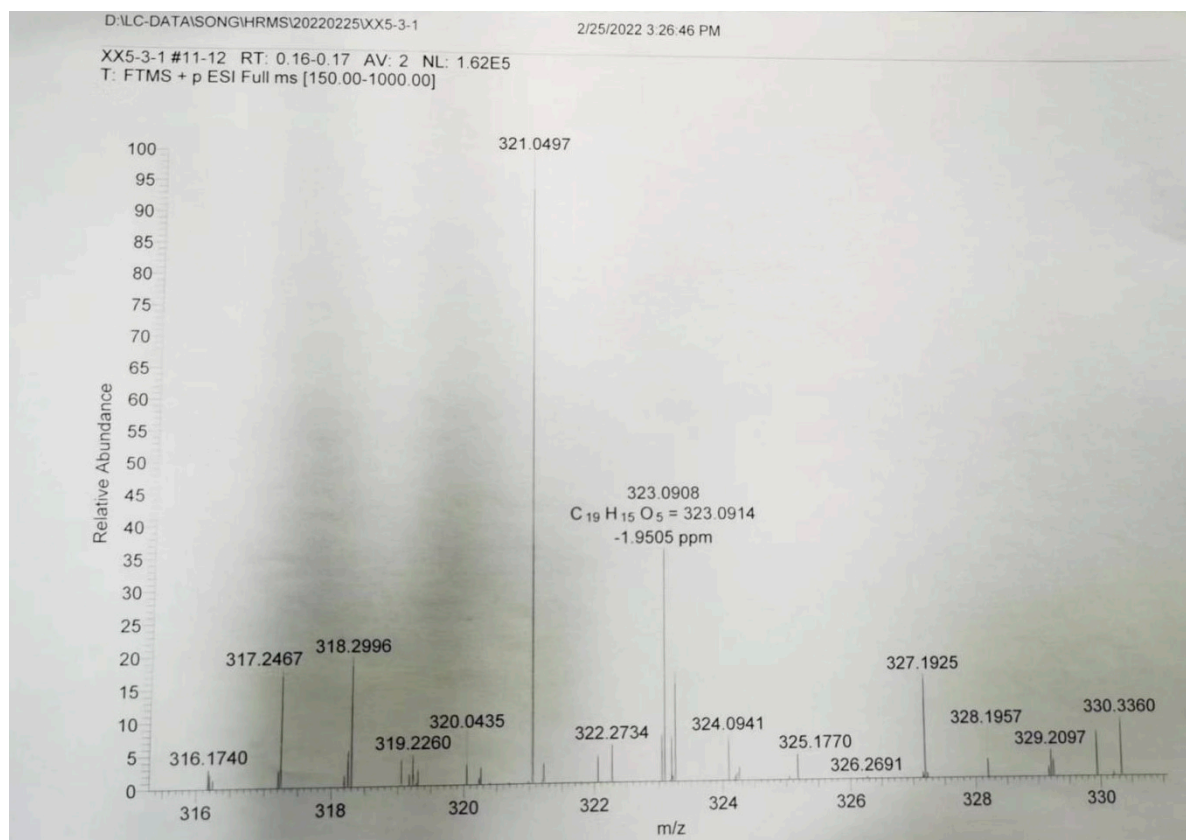

**Figure S28. IR of 3**

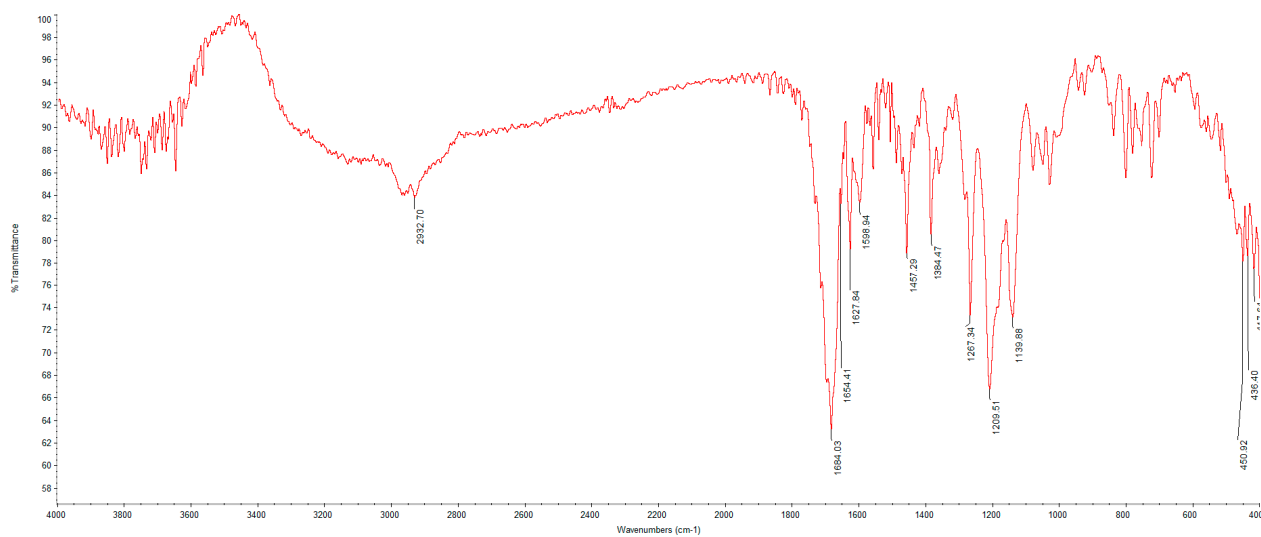

Supplement: s1 [file s1]
